# Supplementary material for: Design, Synthesis, Fungicidal and Insecticidal Activities of Novel Diamide Compounds Combining Pyrazolyl and Polyfluoro-Substituted Phenyl into Alanine or 2-Aminobutyric Acid Skeletons
Source: MDPI journal article supplement (doi:10.3390/molecules28020561), 2023-01-05
Supplement: s1 [file s1]

Supplementary Materials:

**Design, Synthesis, Fungicidal and Insecticidal  
Activities of Novel Diamide Compounds  
Combining Pyrazolyl and Polyfluoro-Substituted  
Phenyl into Alanine or 2-Aminobutyric acid  
Skeletons**

**Zhi-Yuan Xu <sup>1,2</sup>, Tong Feng <sup>1,2</sup>, Qing Liu <sup>1</sup>, Hui-Ting Li <sup>1</sup>, Wei Wei <sup>1</sup>, Rong-Chuan Shi <sup>1,2</sup>, Yi-Ming Cao <sup>1,2</sup>, \* and Shang-Zhong Liu <sup>1,2</sup>, \***

<sup>1</sup>Innovation center of Pesticide Research, Department of Applied Chemistry, College of Science, China Agricultural University, Beijing 100193, China;

<sup>2</sup>Key laboratory of National Forestry and Grassland Administration on Pest Chemical Control, China Agricultural University, Beijing 100193, China

\*Correspondence: caoym@cau.edu.cn (Y.-M.C.); shangzho@cau.edu.cn (S.-Z.L.); Tel.: +86-10-62731070 (S.-Z.L.)

## The NMR spectrogram of title compounds

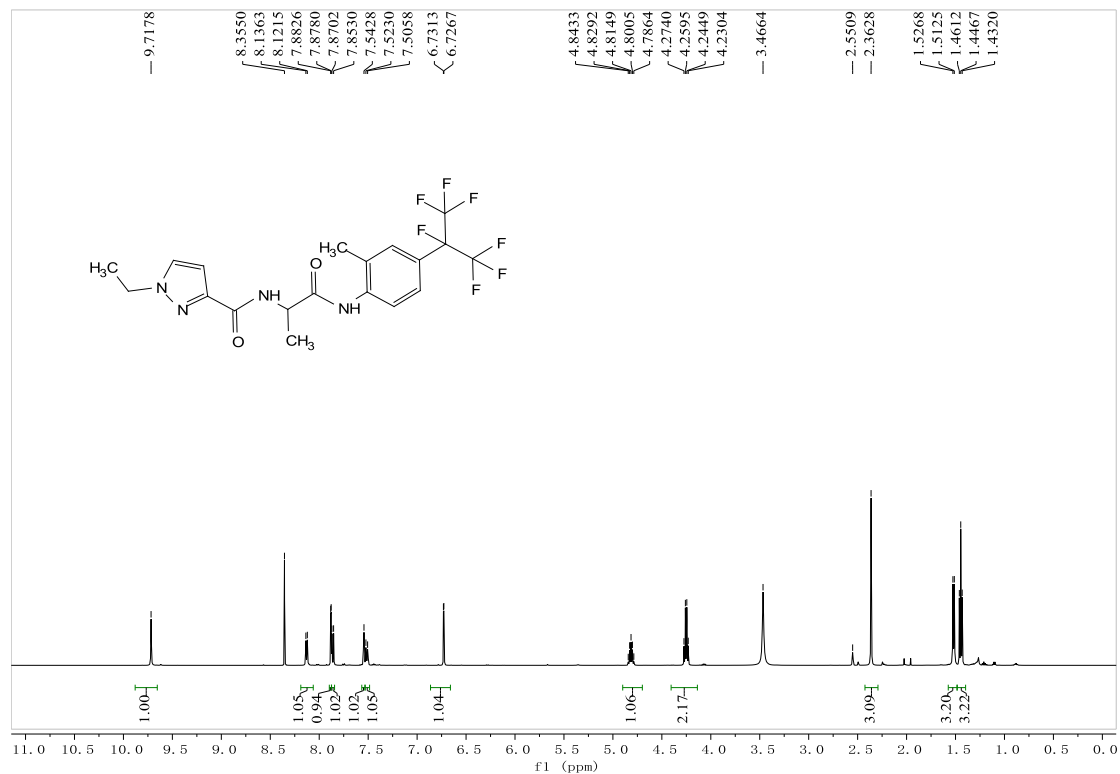

**Figure S1.** <sup>1</sup>H NMR spectrum of compound I-1.

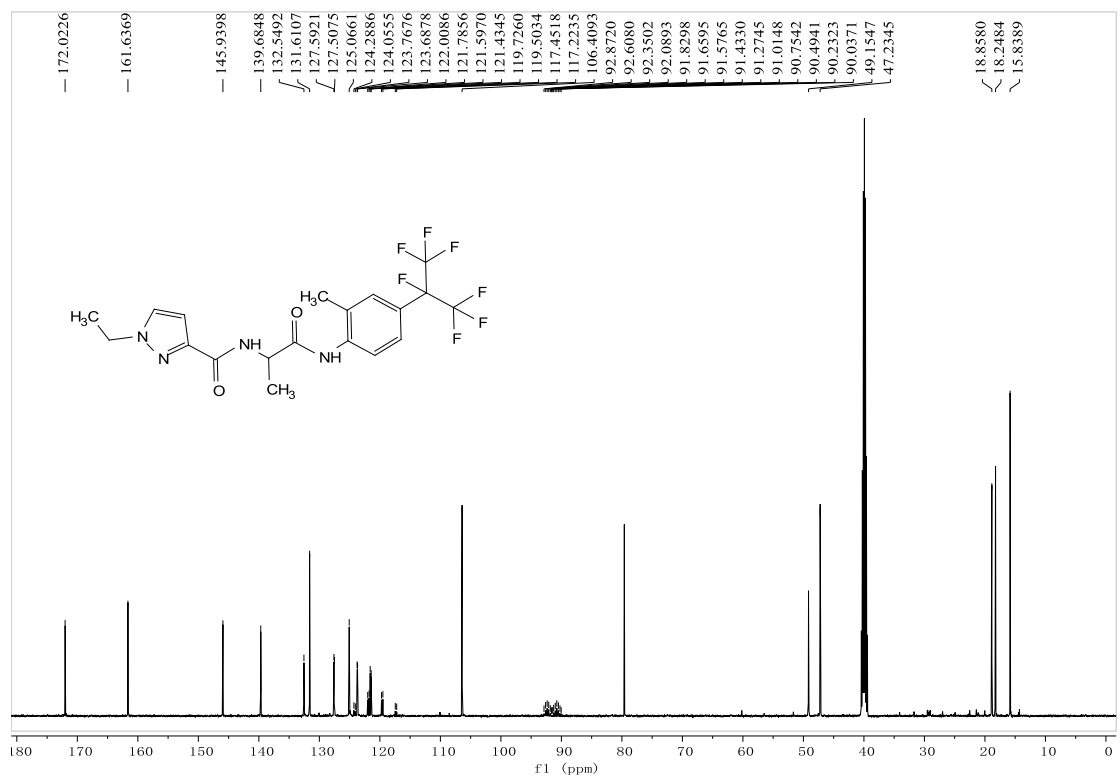

**Figure S2.** <sup>13</sup>C NMR spectrum of compound I-1.

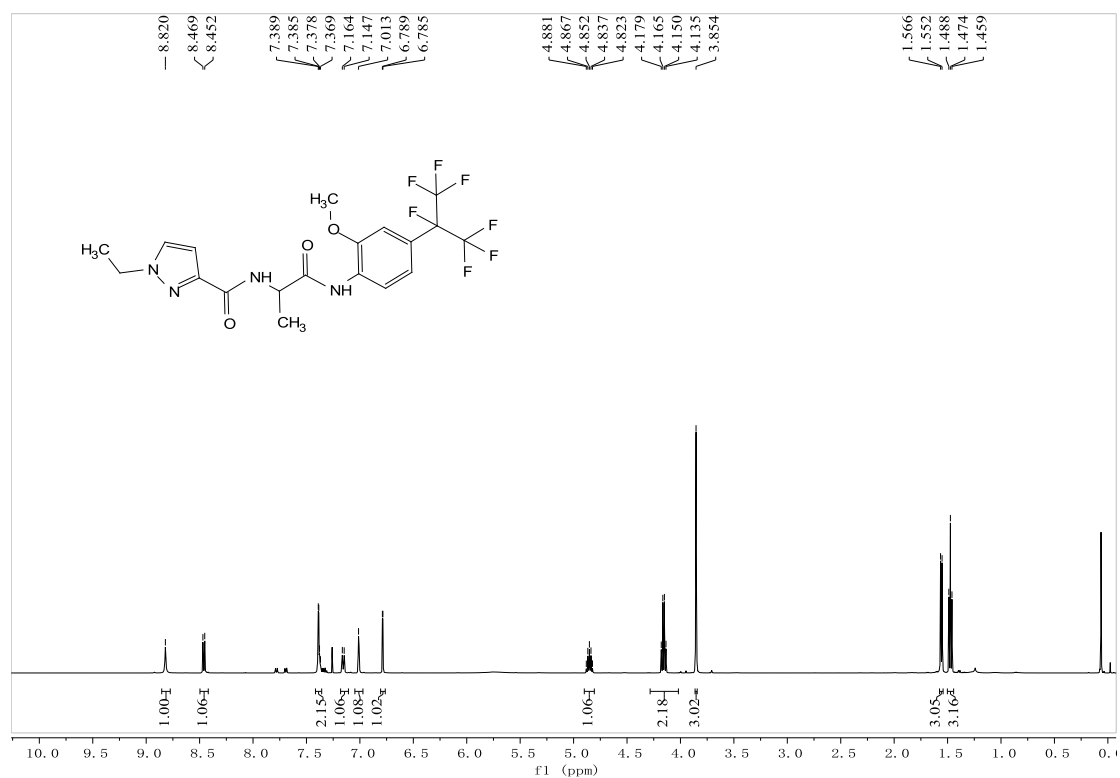

Figure S3. <sup>1</sup>H NMR spectrum of compound I-2.

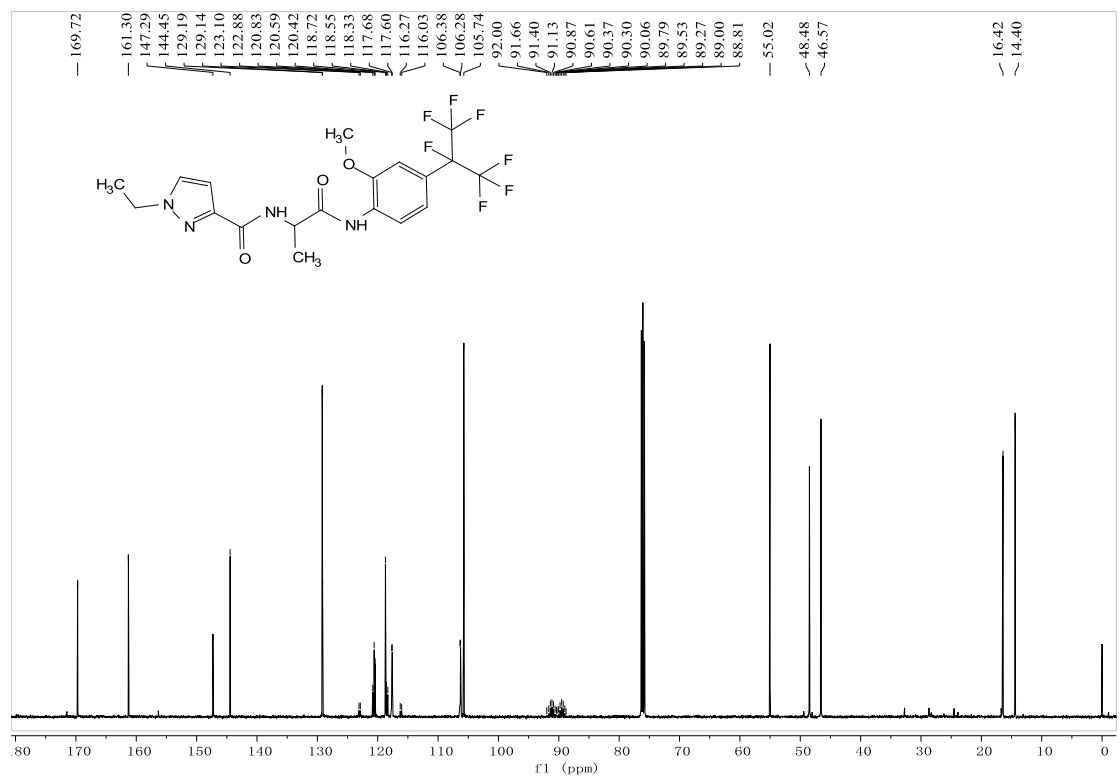

Figure S4. <sup>13</sup>C NMR spectrum of compound I-2.

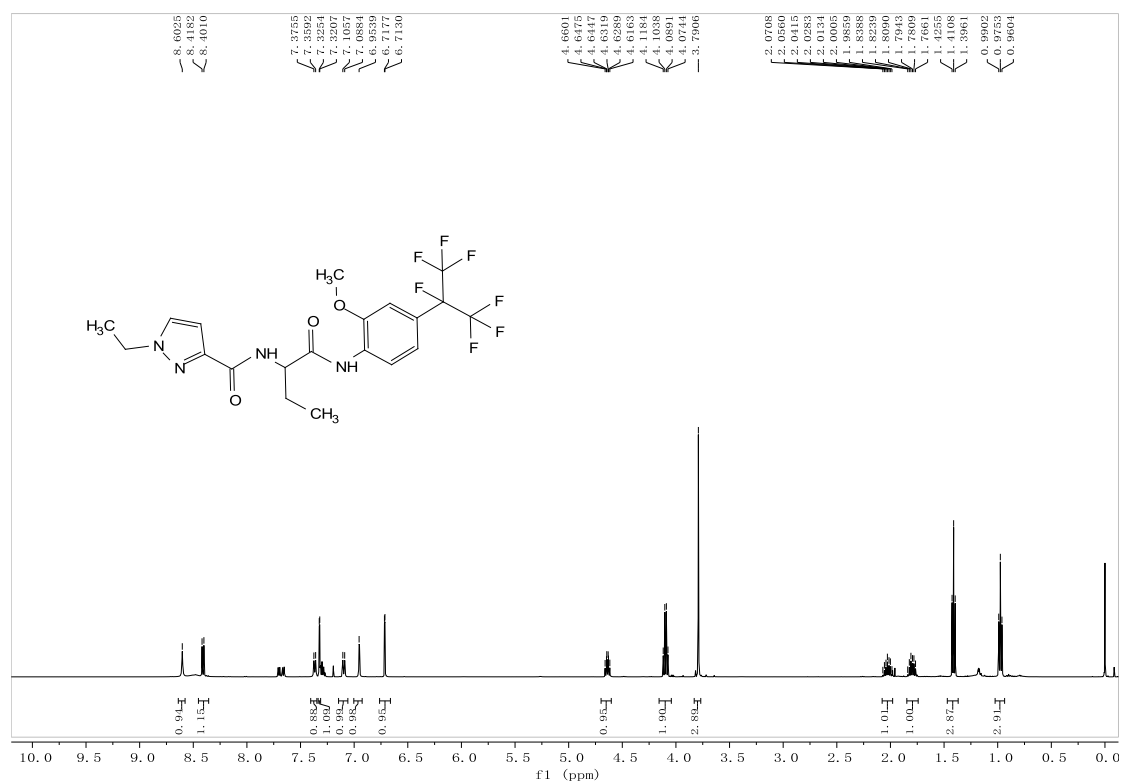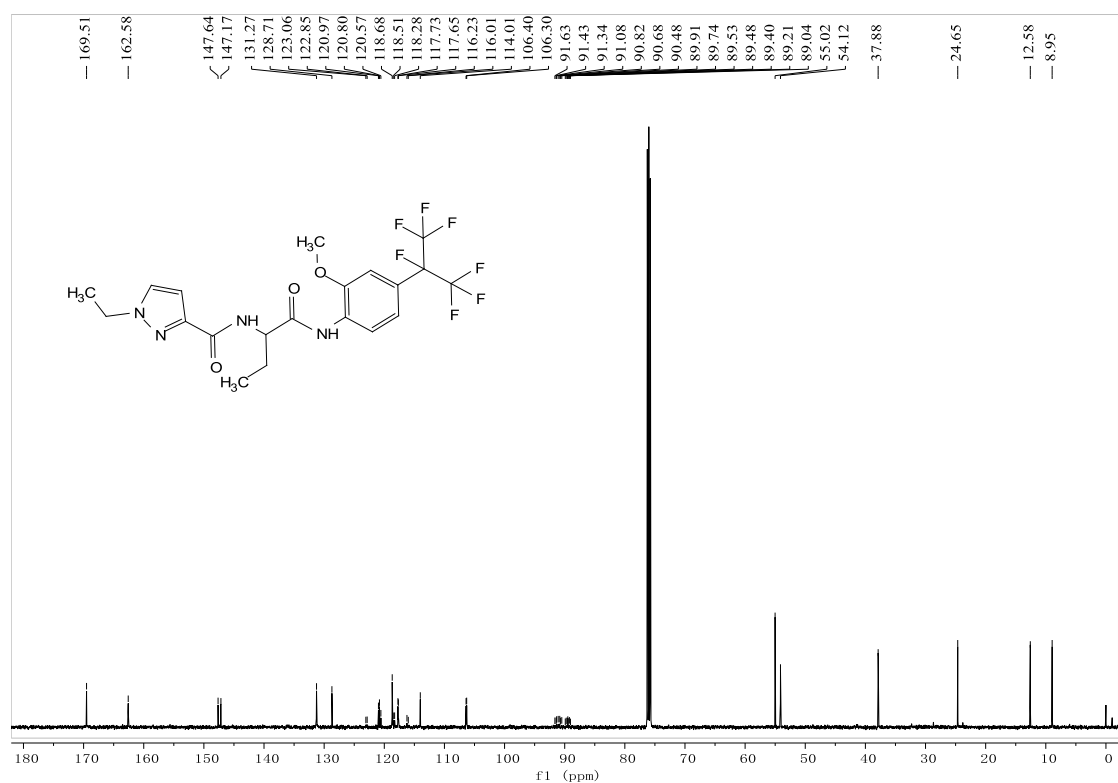

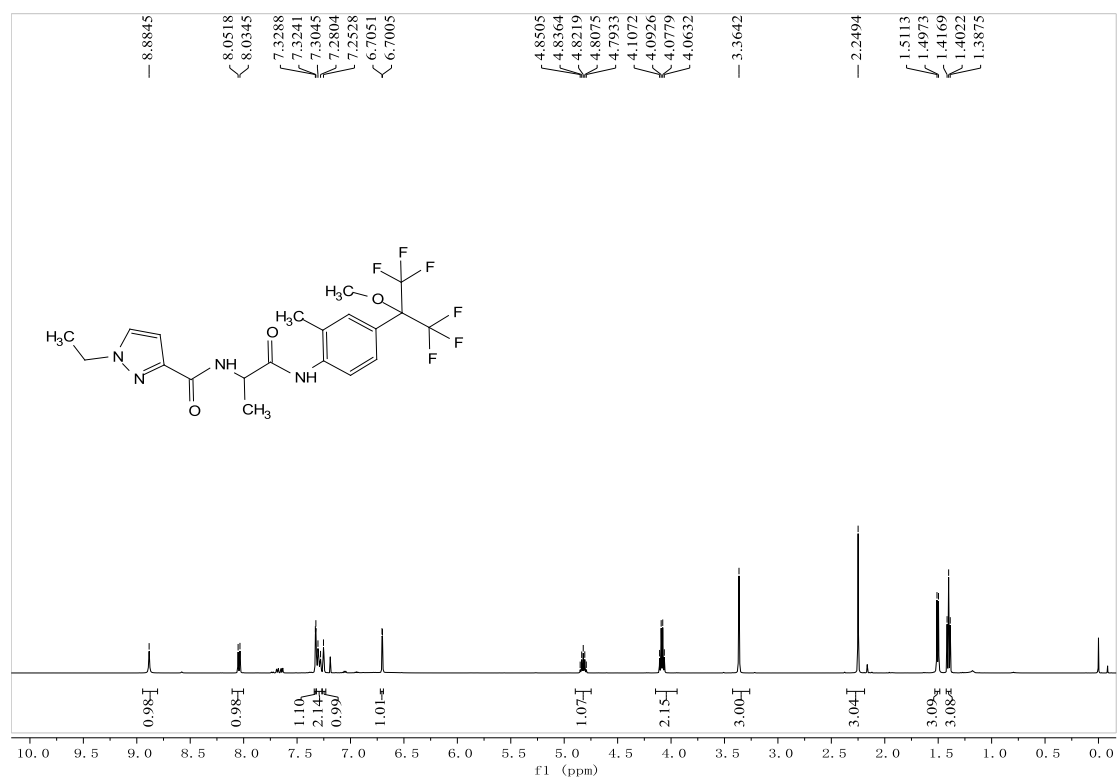

**Figure S7.** <sup>1</sup>H NMR spectrum of compound I-4.

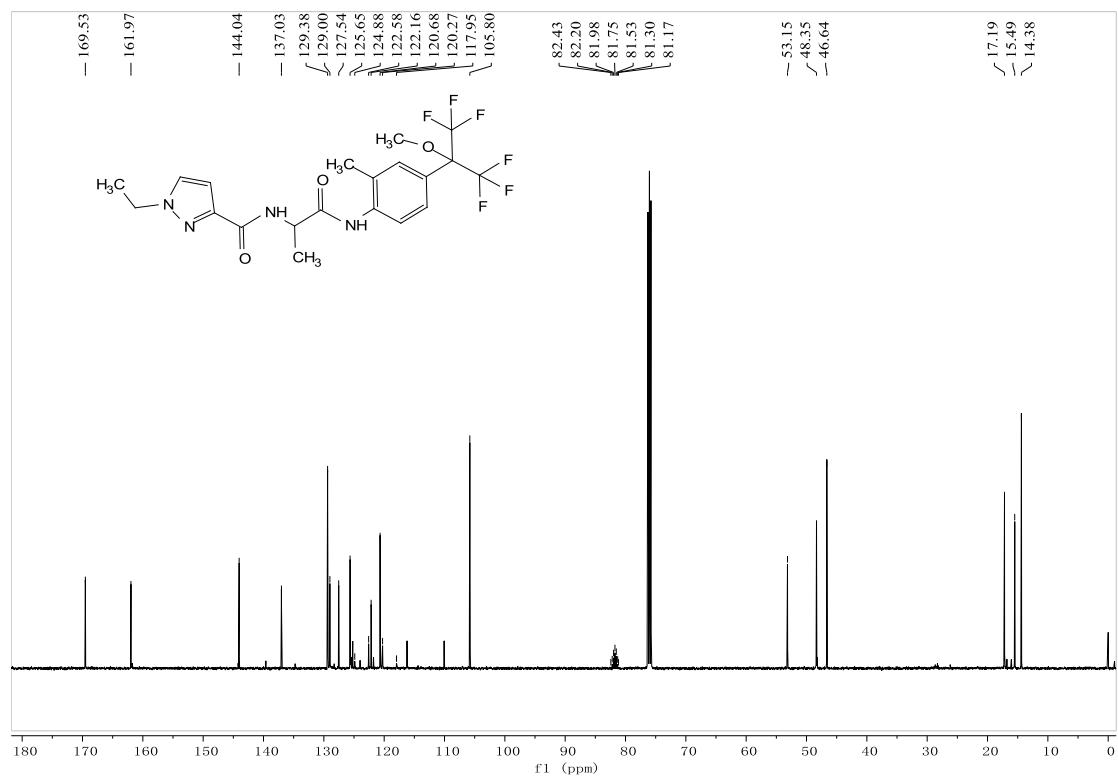

**Figure S8.** <sup>13</sup>C NMR spectrum of compound I-4.

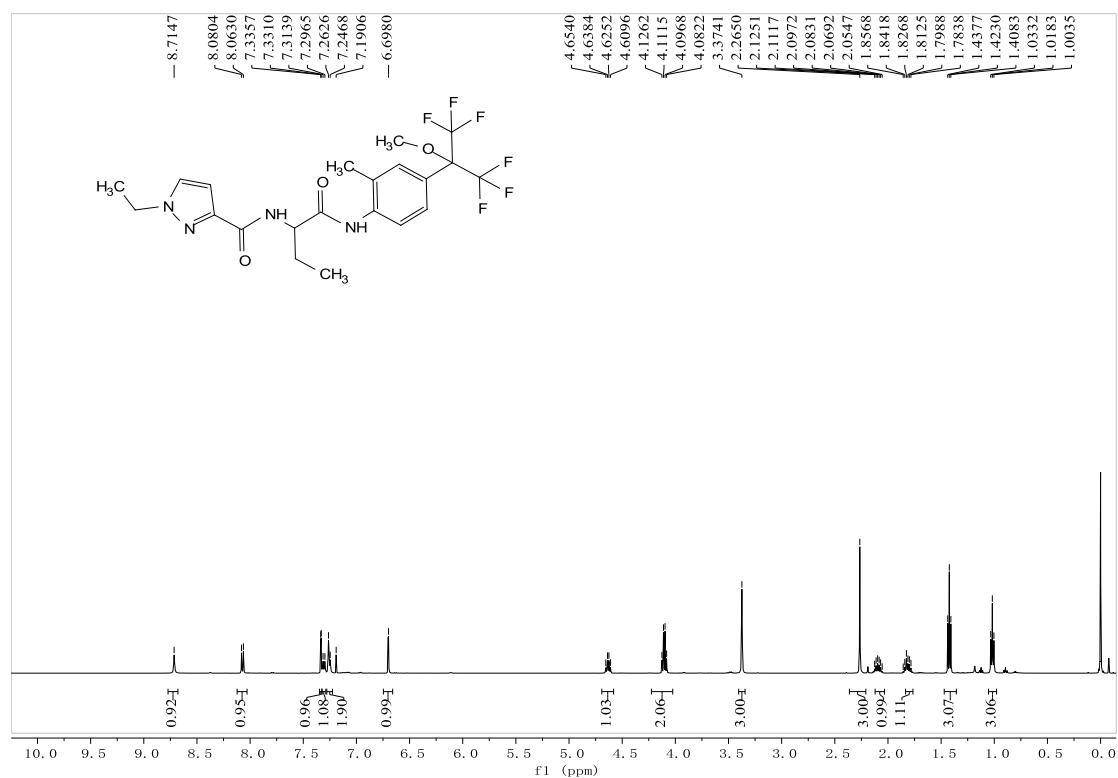

Figure S9. <sup>1</sup>H NMR spectrum of compound I-5.

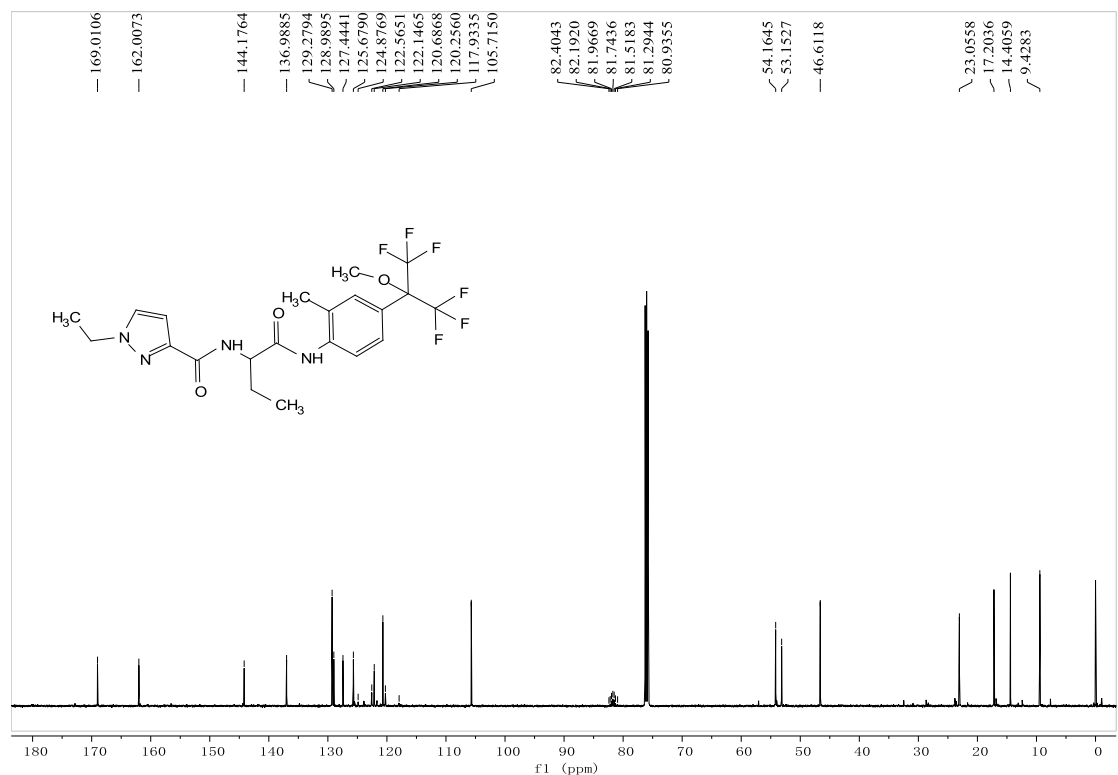

Figure S10. <sup>13</sup>C NMR spectrum of compound I-5.

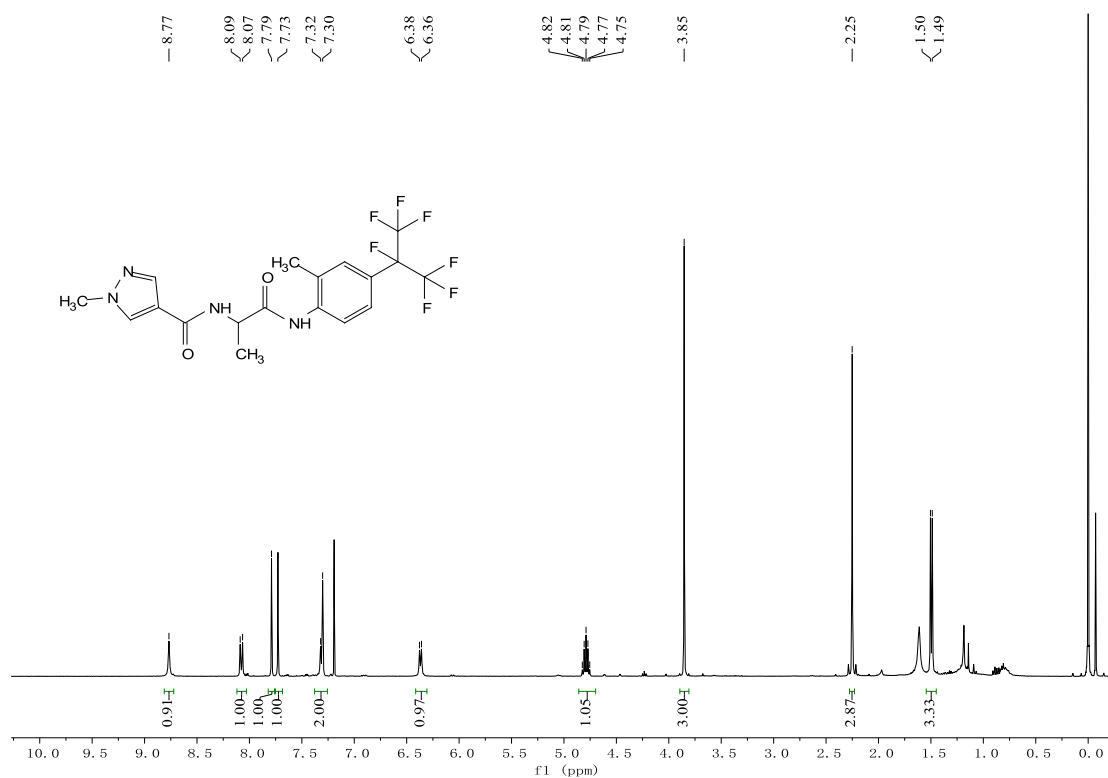

**Figure S11.** <sup>1</sup>H NMR spectrum of compound II-a-6.

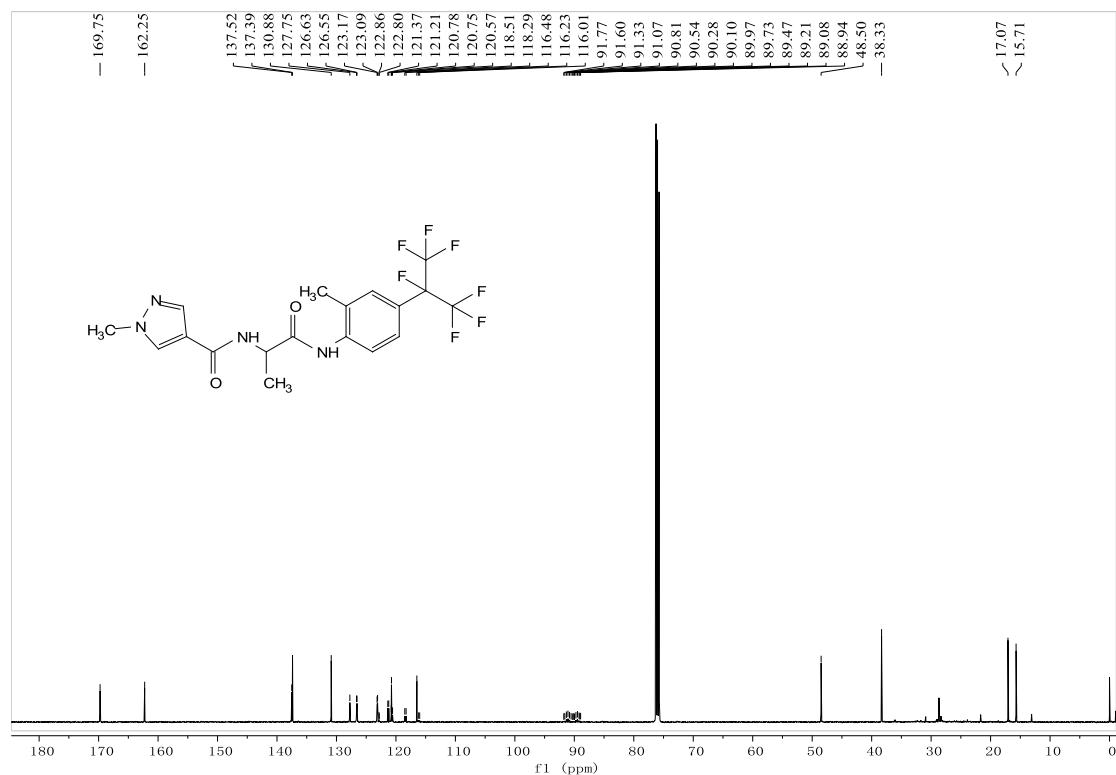

**Figure S12.** <sup>13</sup>C NMR spectrum of compound II-a-6.

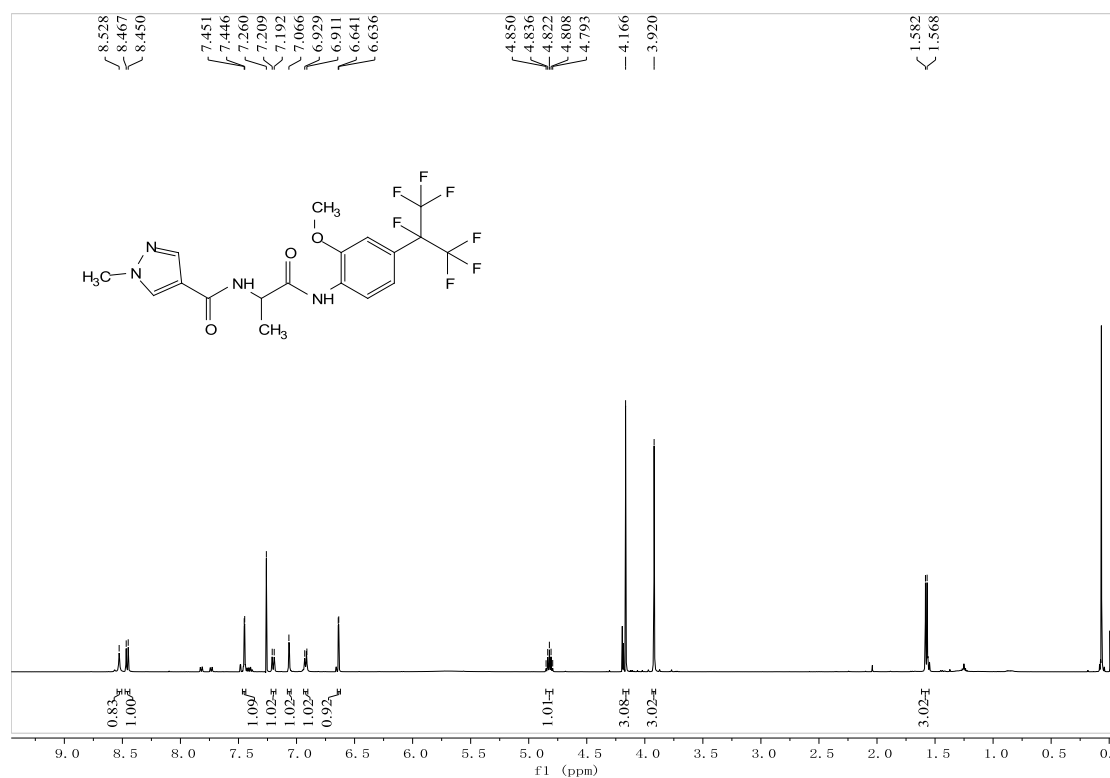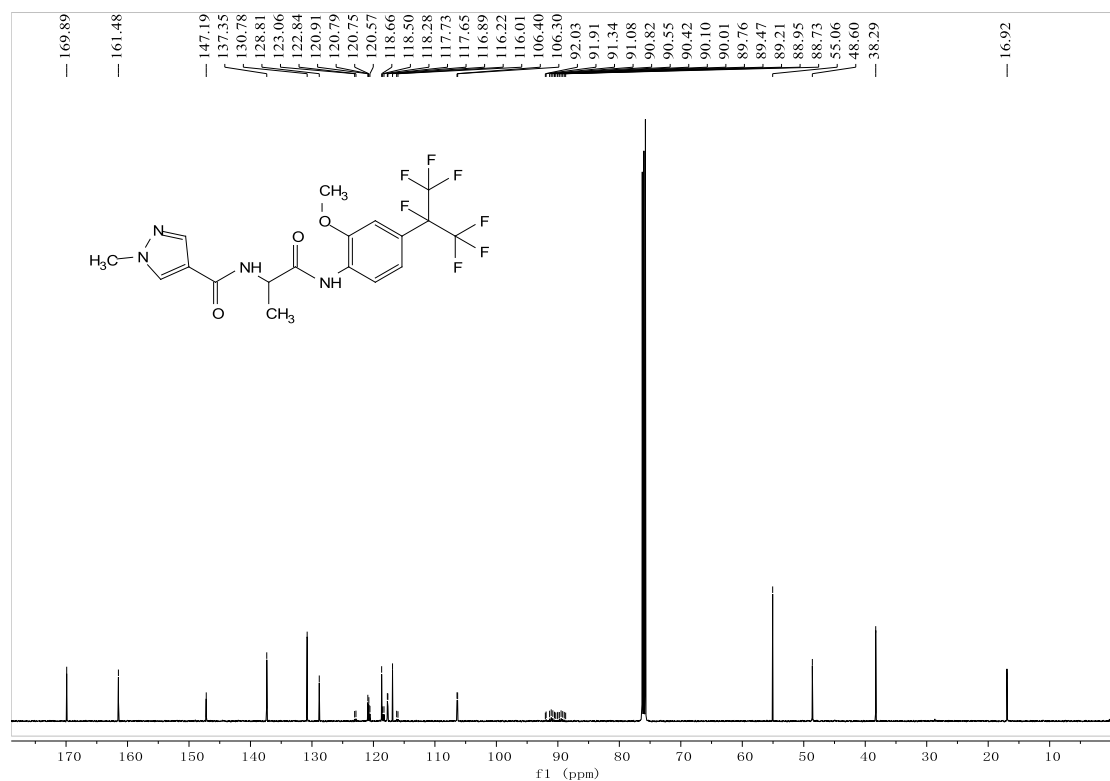



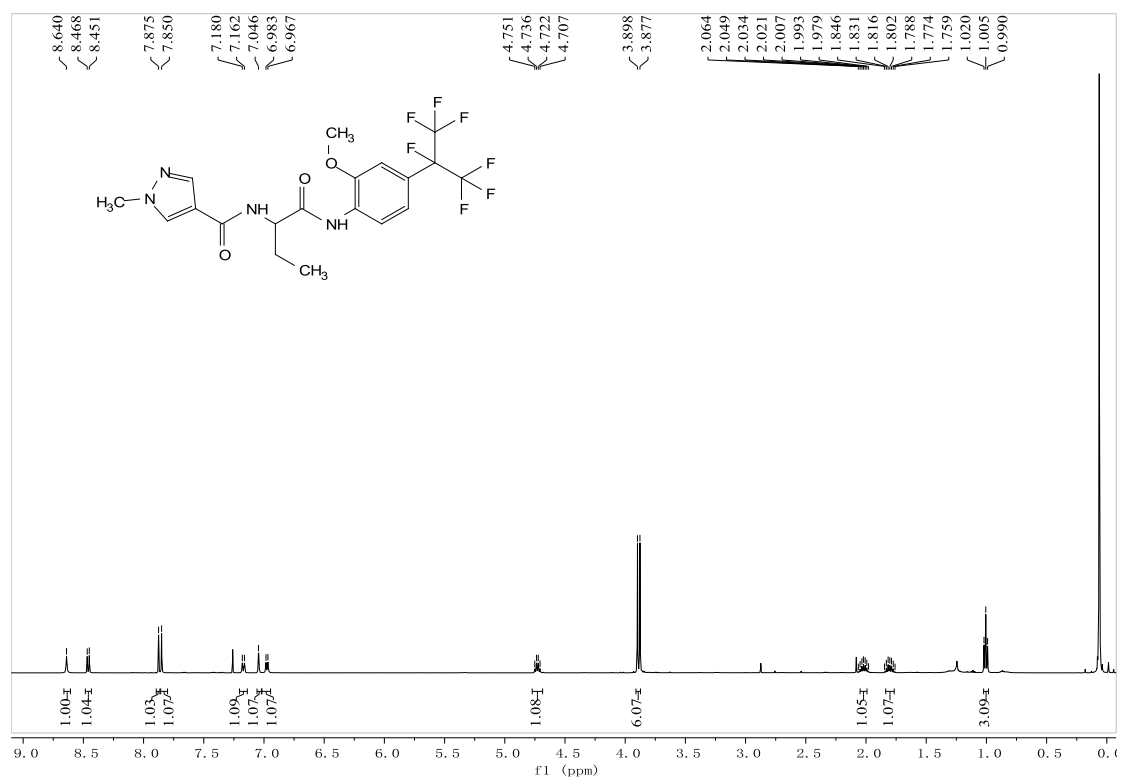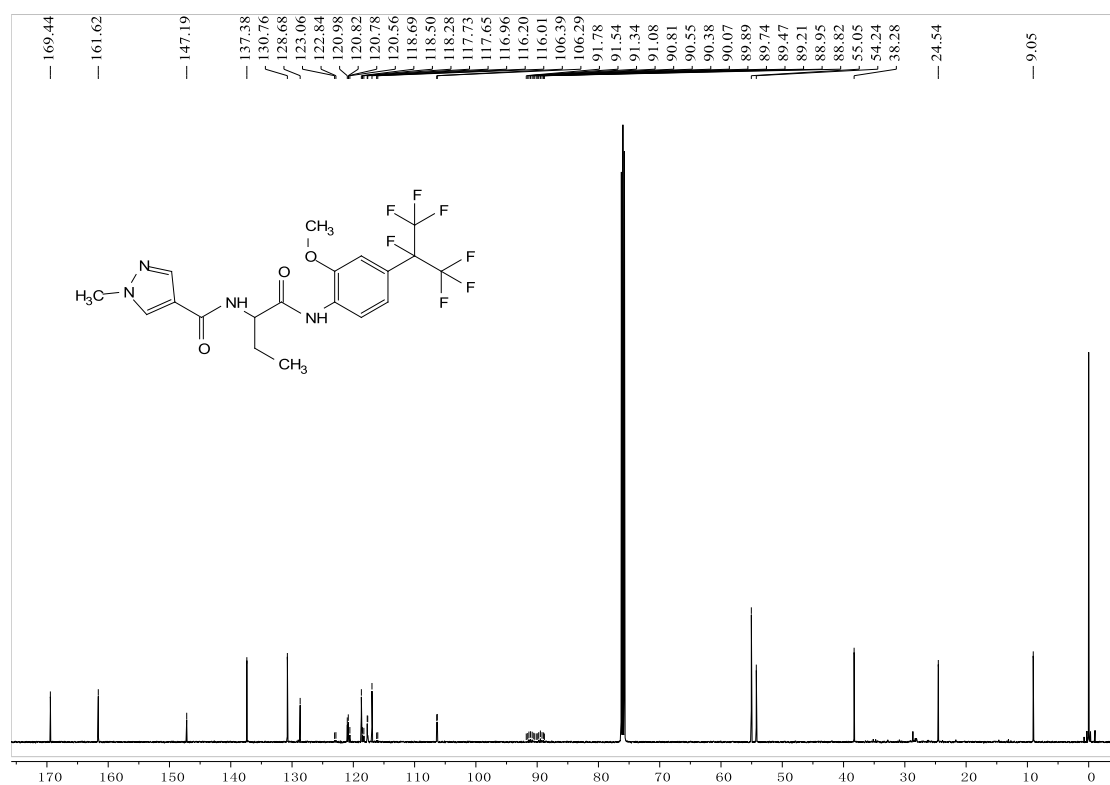

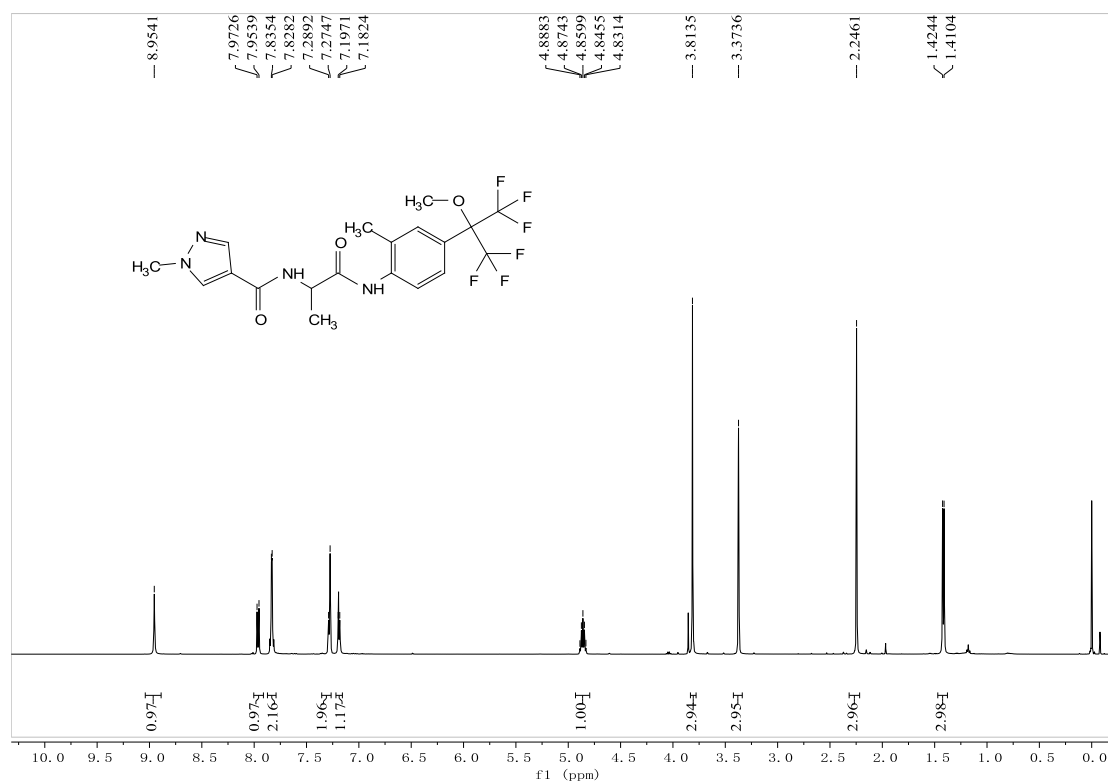

Figure S17. <sup>1</sup>H NMR spectrum of compound II-a-9.

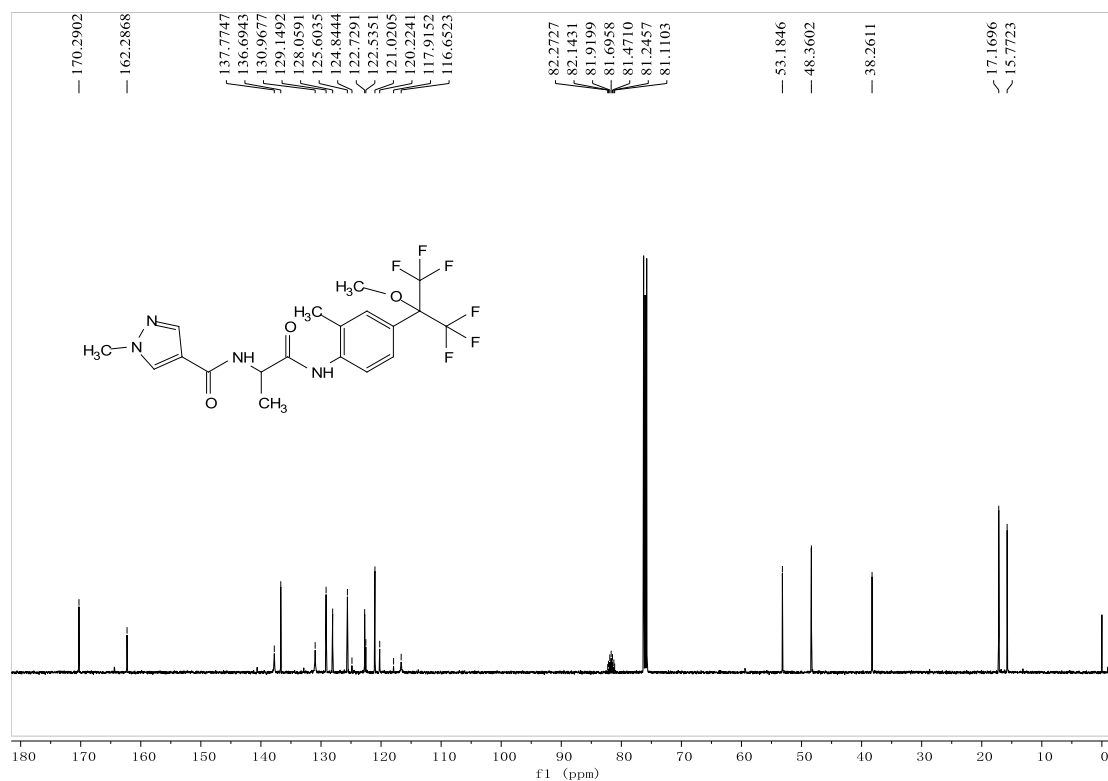

Figure S18. <sup>13</sup>C NMR spectrum of compound II-a-9.

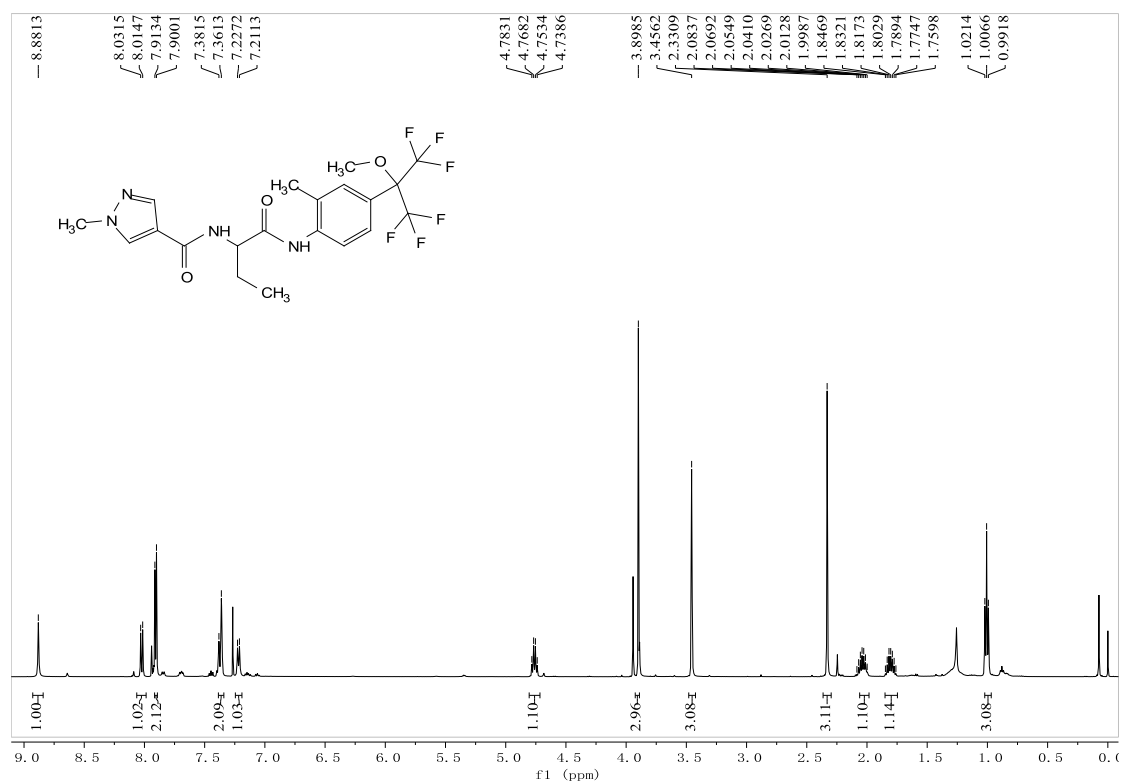

Figure S19. <sup>1</sup>H NMR spectrum of compound II-a-10.

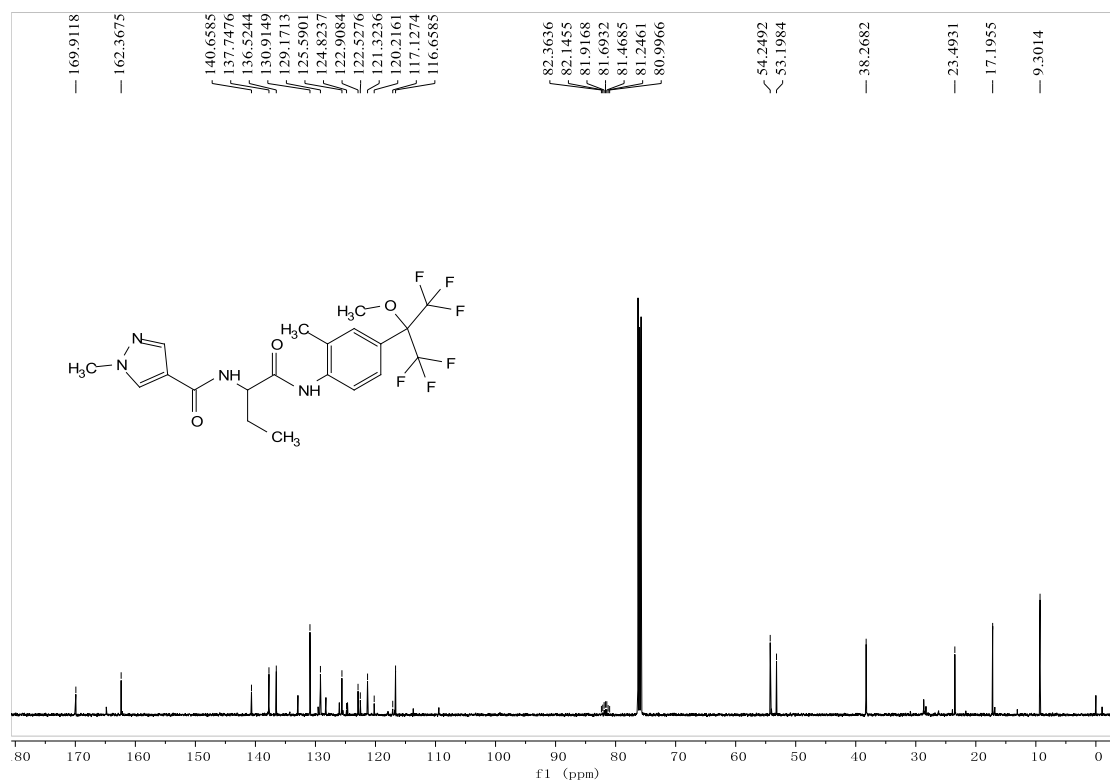

Figure S20. <sup>13</sup>C NMR spectrum of compound II-a-10.

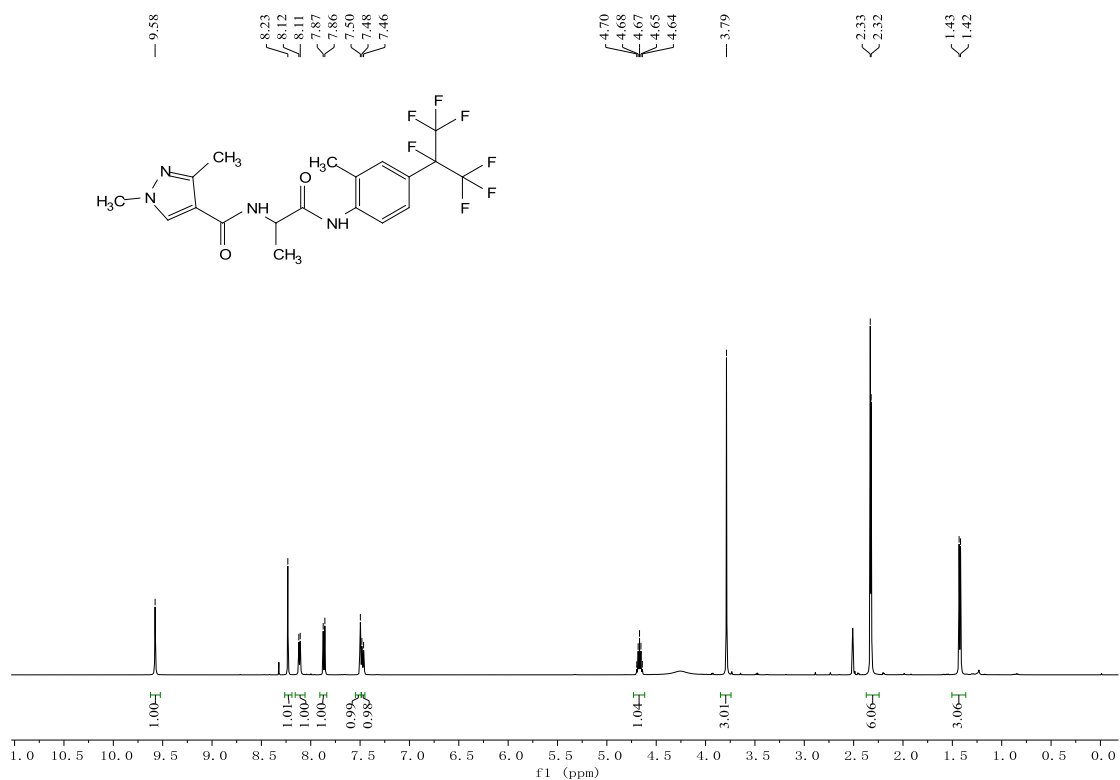

**Figure S21.** <sup>1</sup>H NMR spectrum of compound II-a-11.

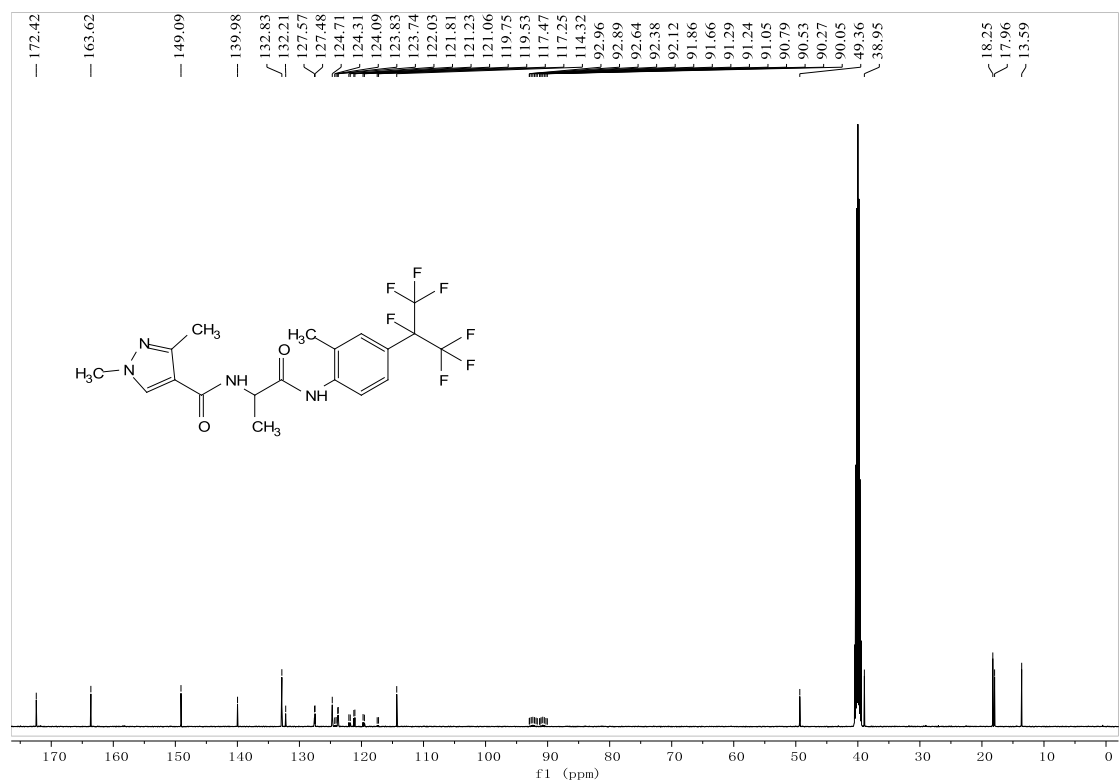

**Figure S22.** <sup>13</sup>C NMR spectrum of compound II-a-11.

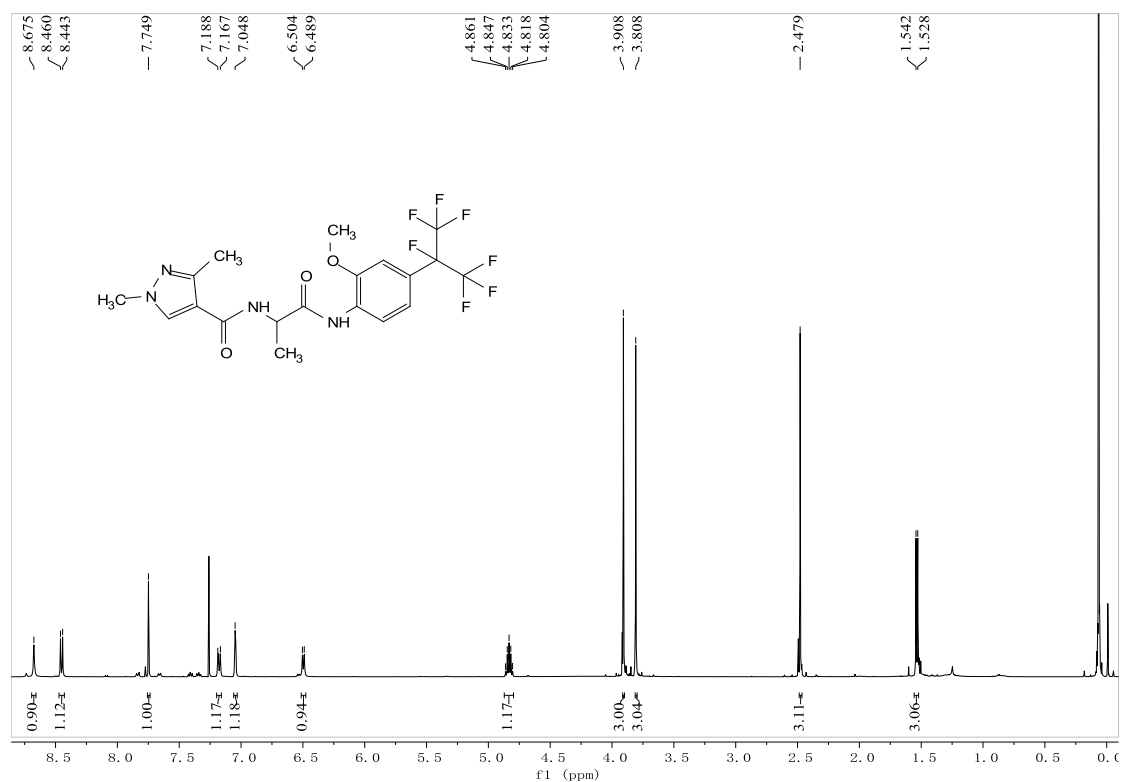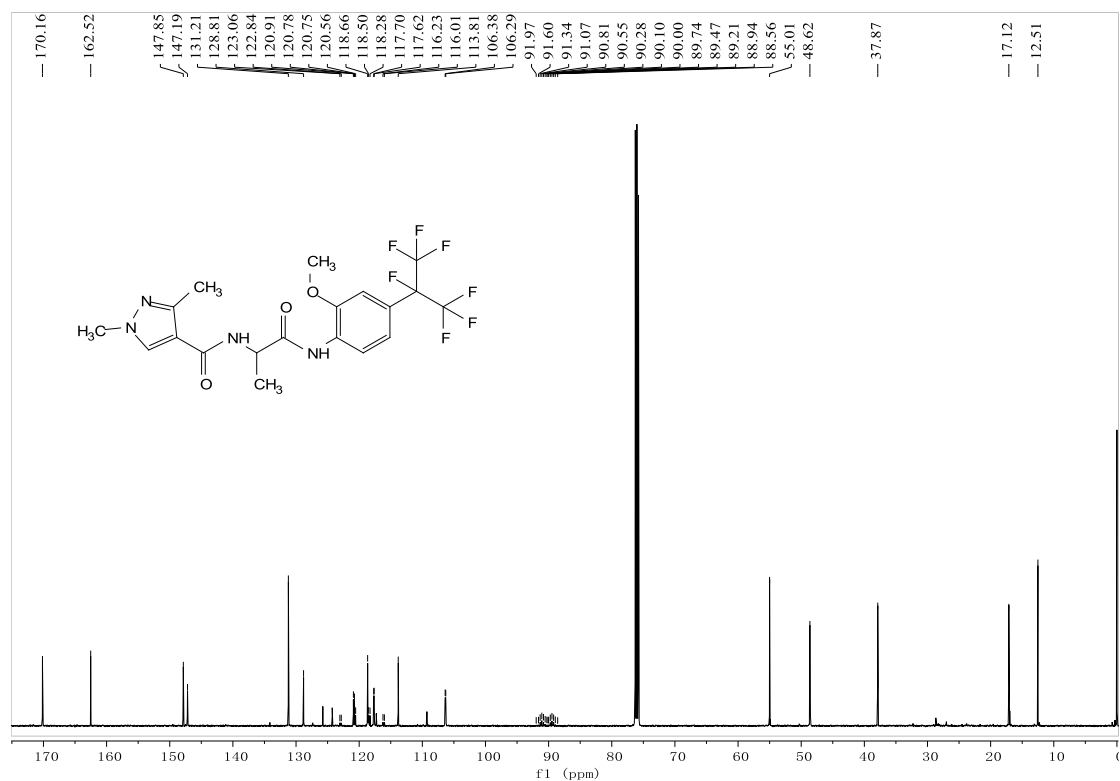

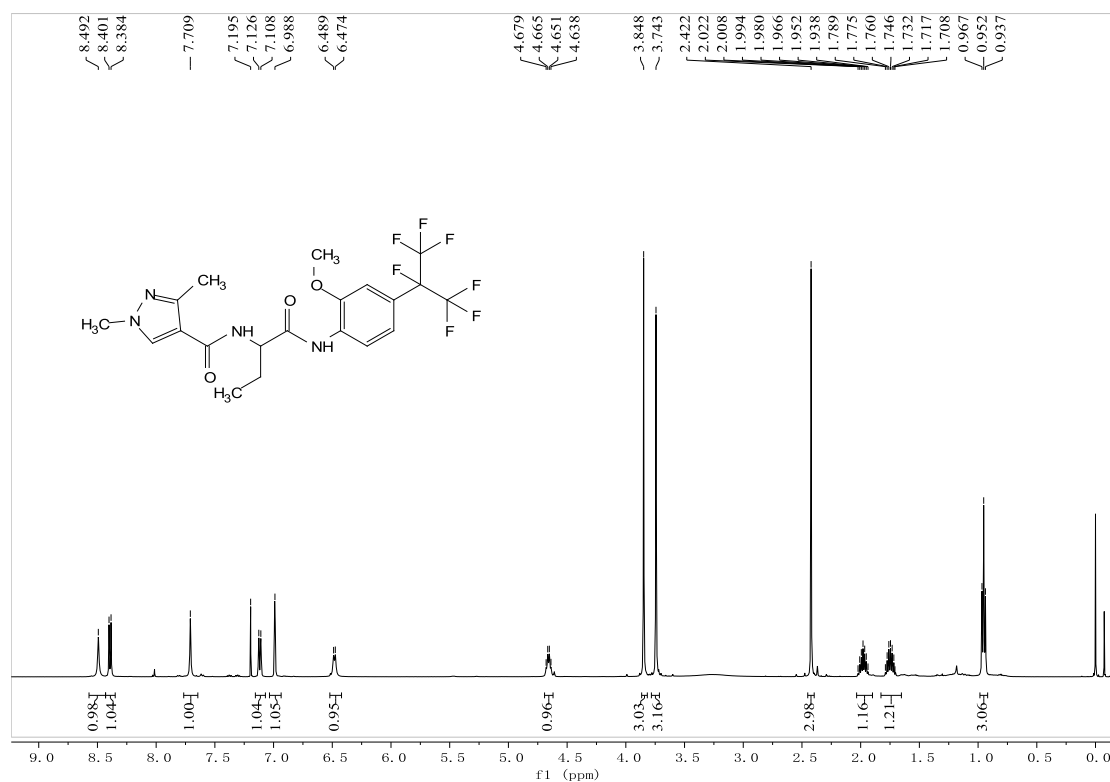

**Figure S25.** <sup>1</sup>H NMR spectrum of compound II-a-13.

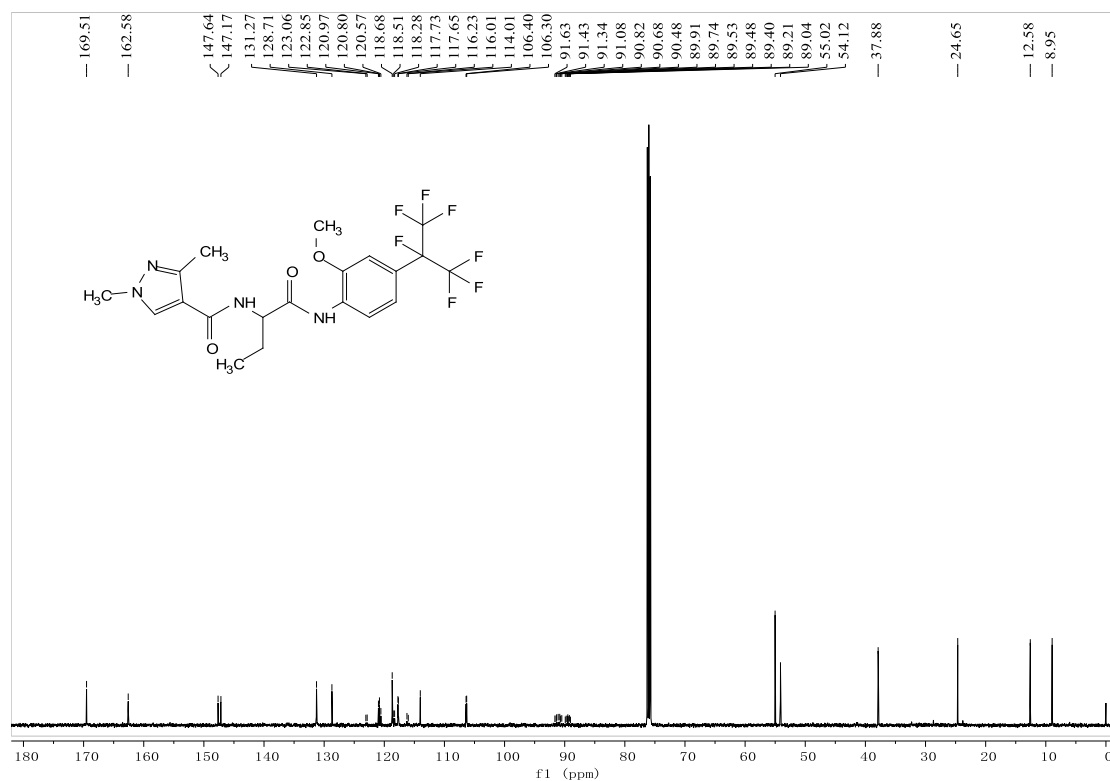

**Figure S26.** <sup>13</sup>C NMR spectrum of compound II-a-13.

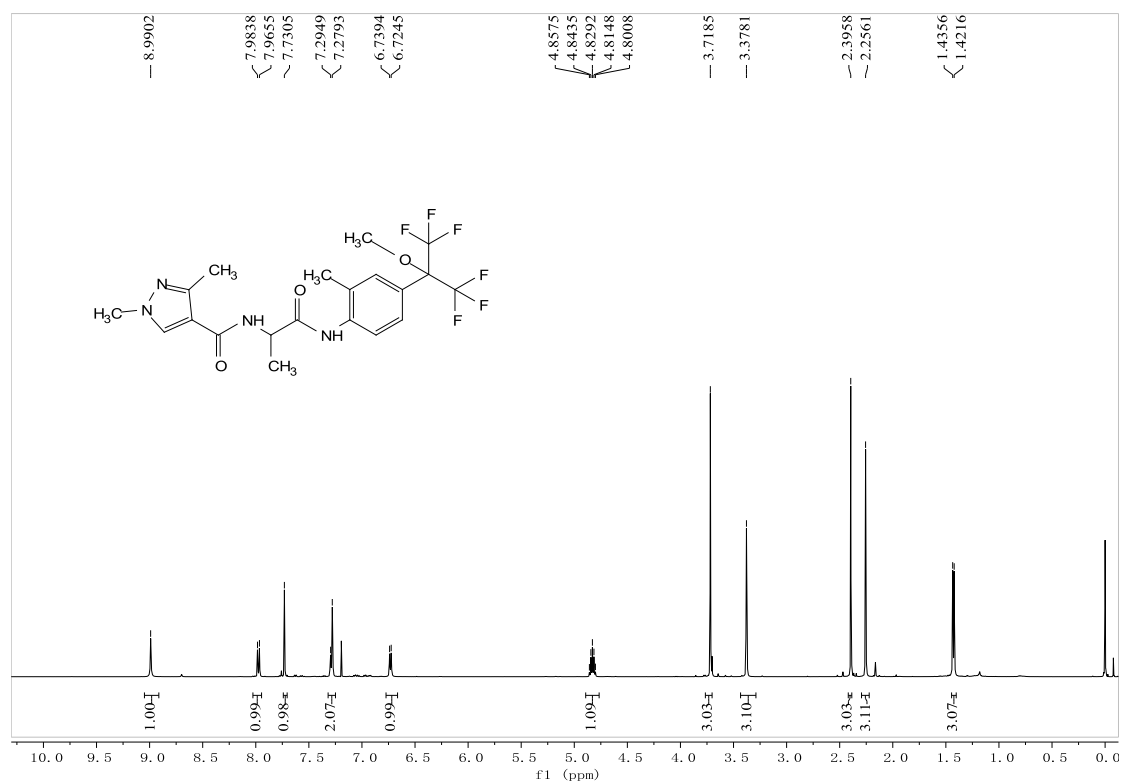

Figure S27.  $^1\text{H}$  NMR spectrum of compound II-a-14.

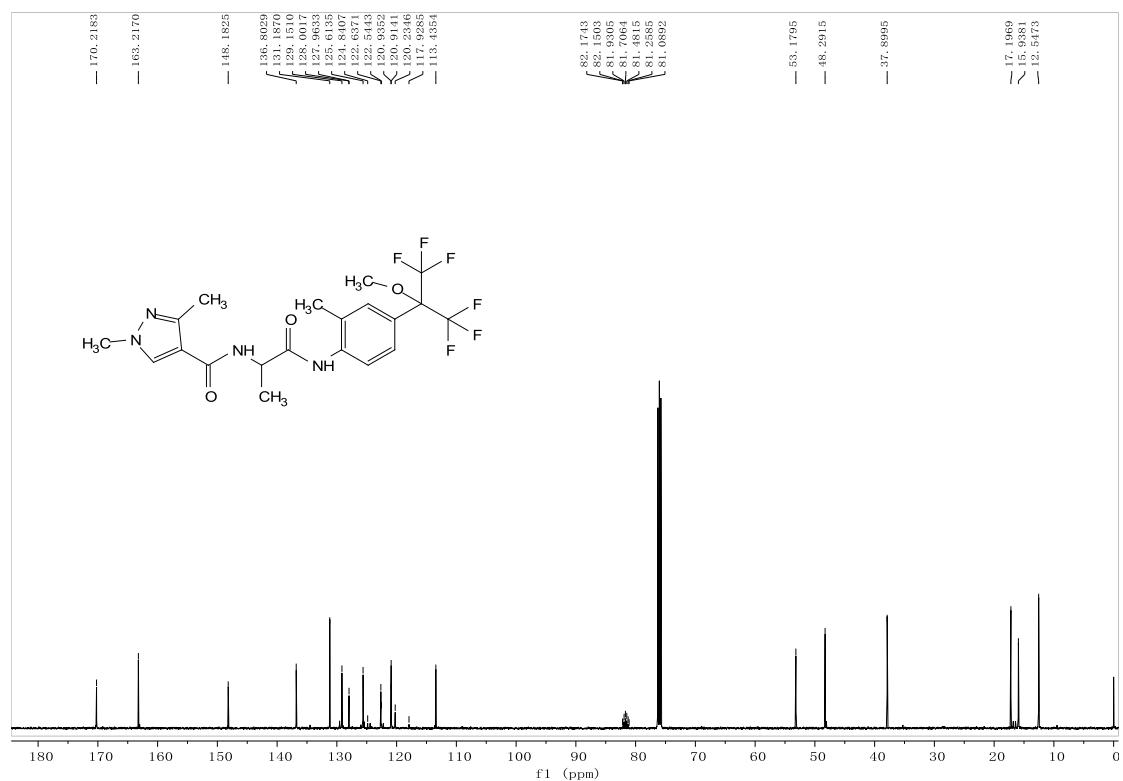

Figure S28.  $^{13}\text{C}$  NMR spectrum of compound II-a-14.

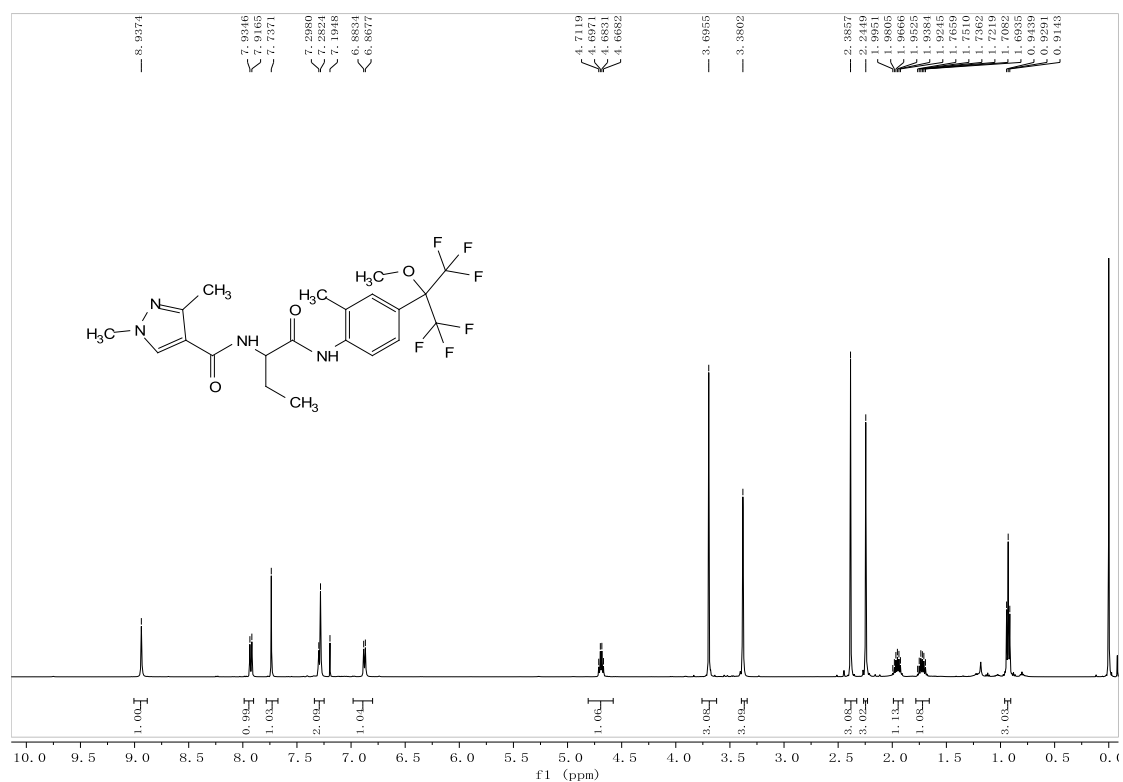

Figure S29. <sup>1</sup>H NMR spectrum of compound II-a-15.

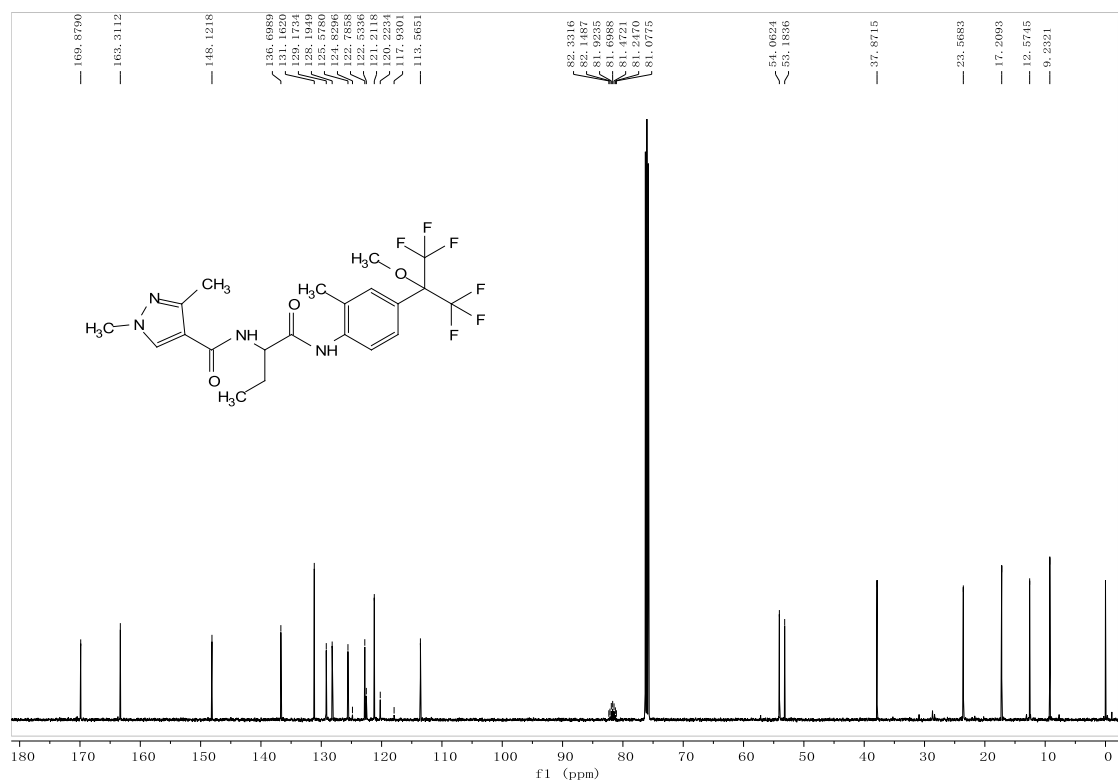

Figure S30. <sup>13</sup>C NMR spectrum of compound II-a-15.



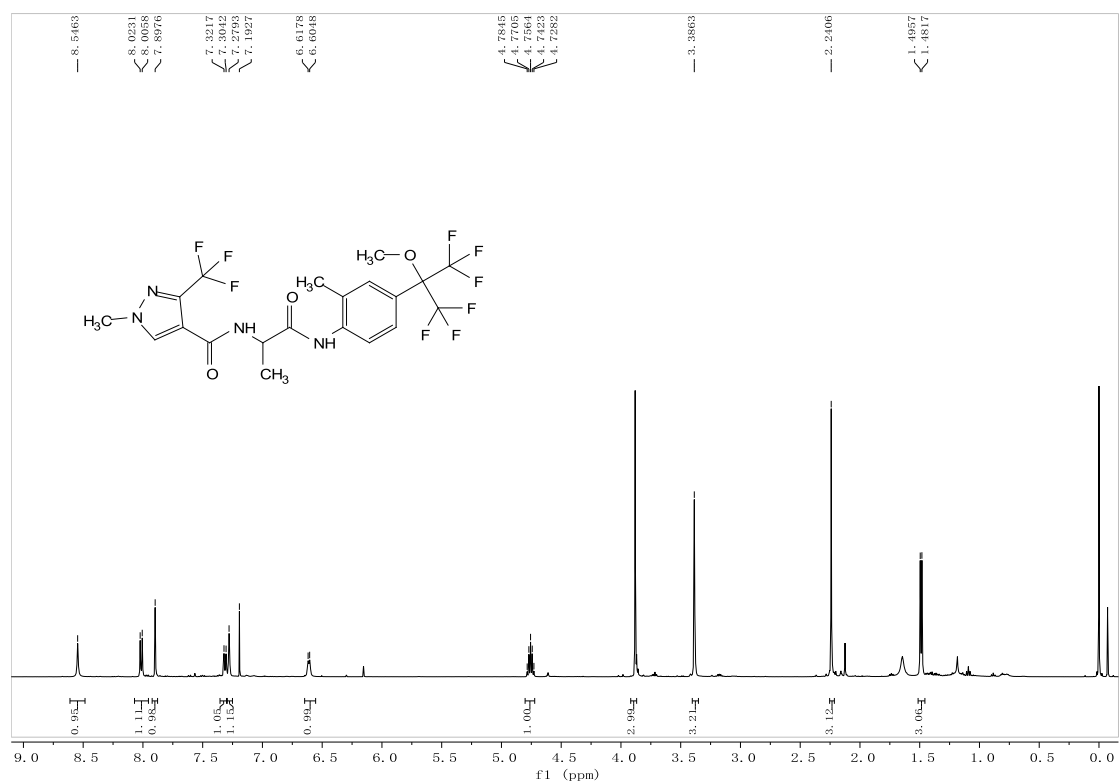

**Figure S31.** <sup>1</sup>H NMR spectrum of compound II-a-16.

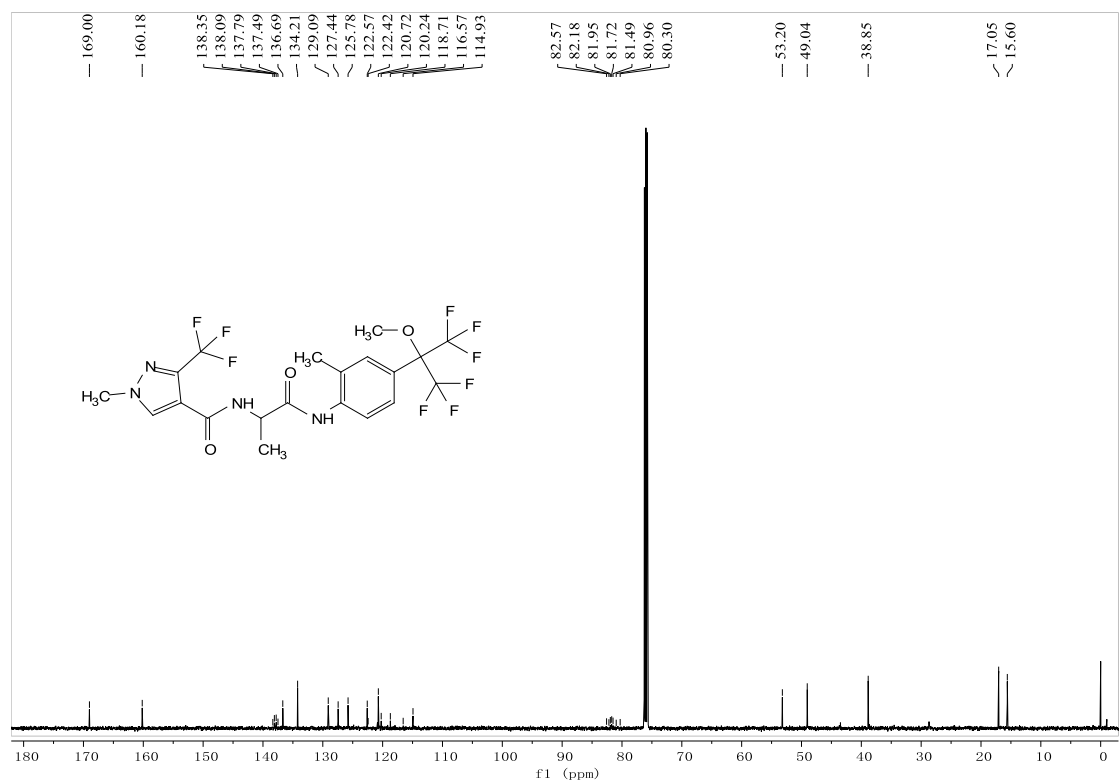

**Figure S32.** <sup>13</sup>C NMR spectrum of compound II-a-16.

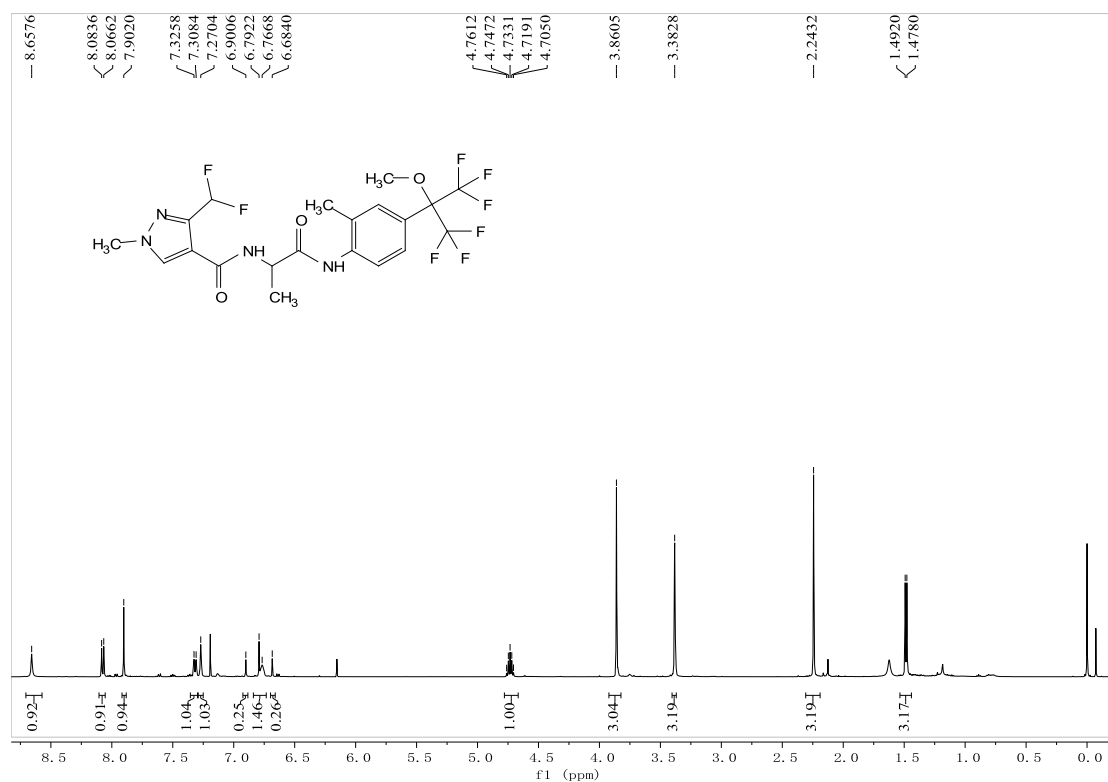

Figure S33. <sup>1</sup>H NMR spectrum of compound II-a-17.

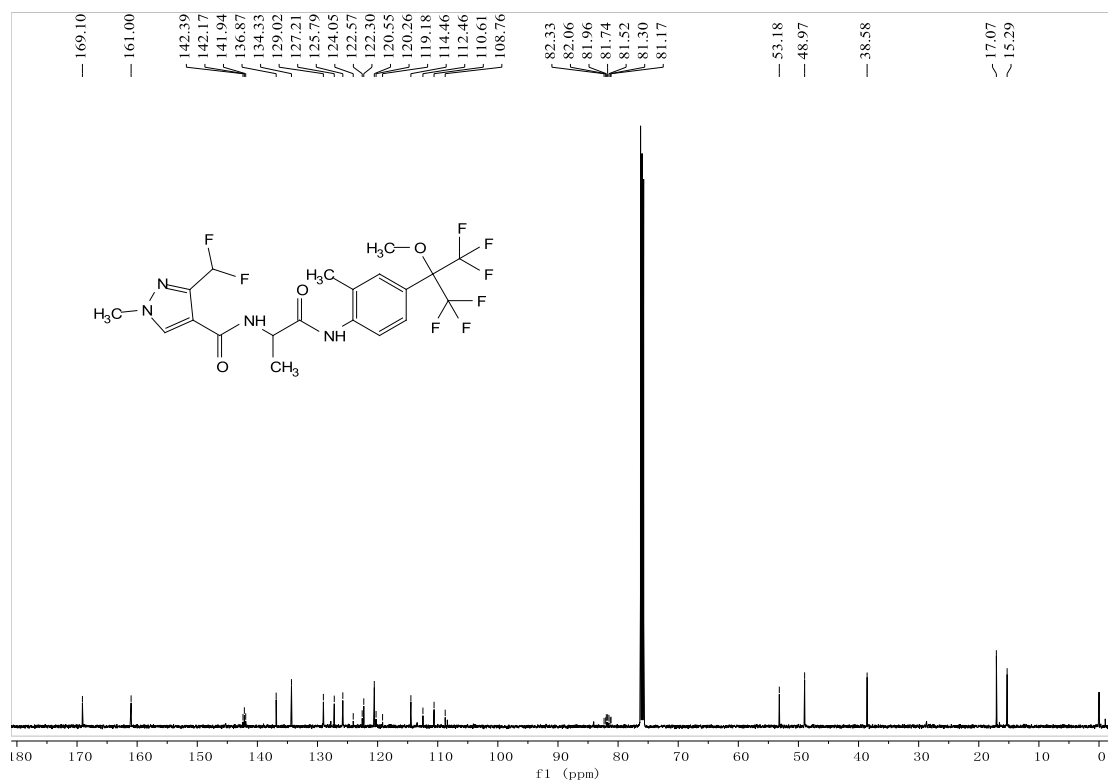

Figure S34. <sup>13</sup>C NMR spectrum of compound II-a-17.

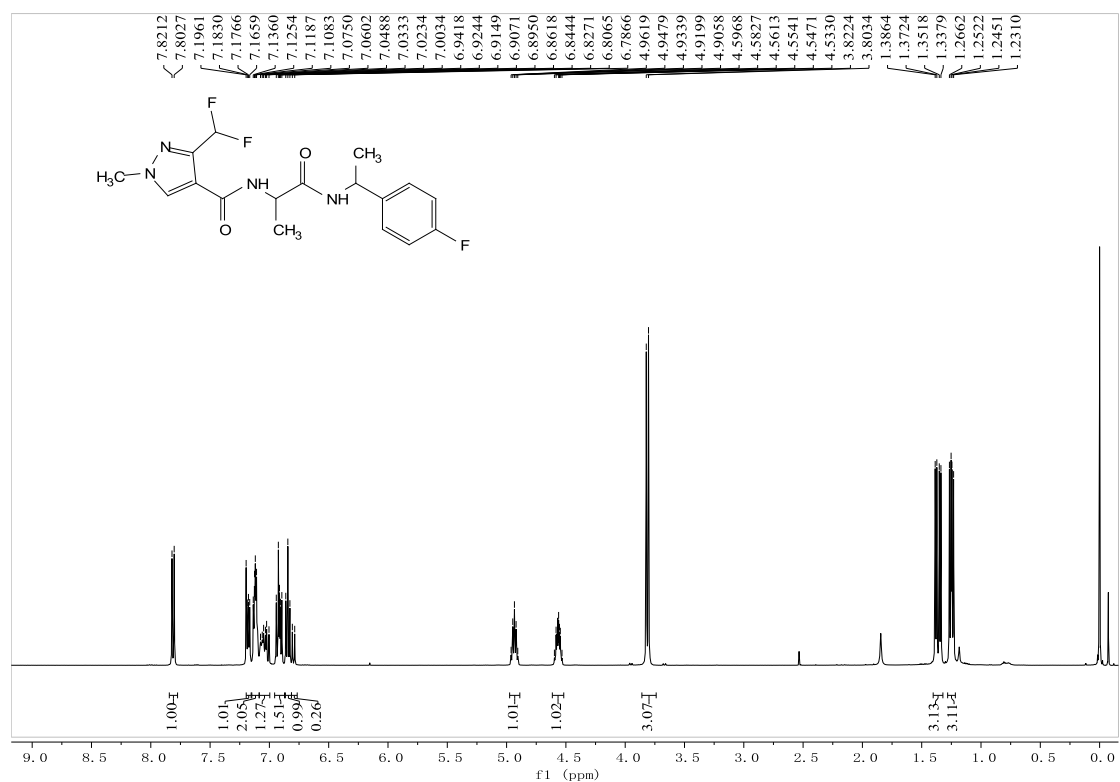

Figure S35. <sup>1</sup>H NMR spectrum of compound II-b-18.

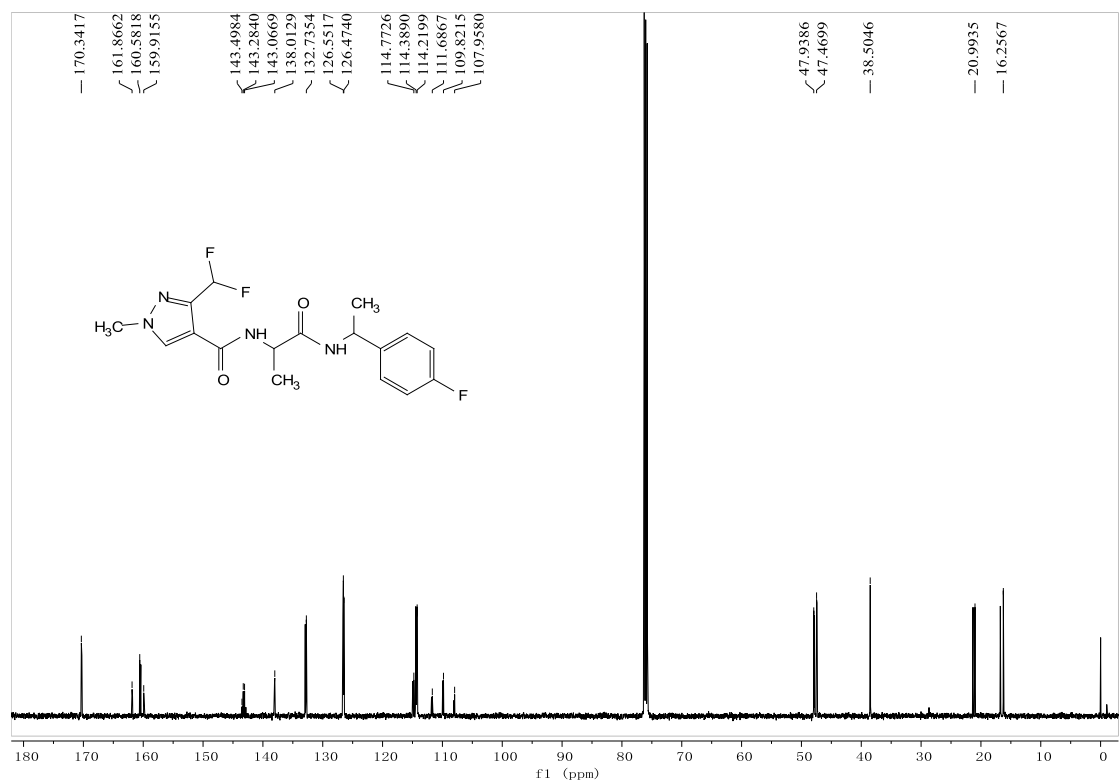

Figure S36. <sup>13</sup>C NMR spectrum of compound II-b-18.

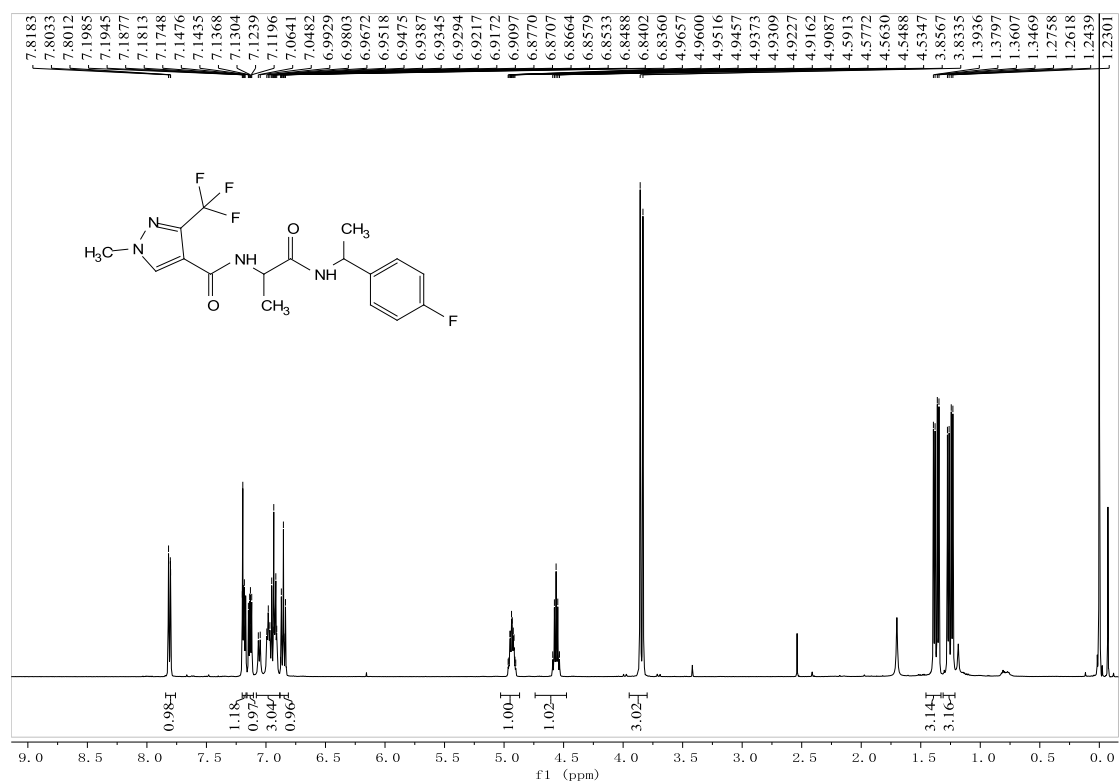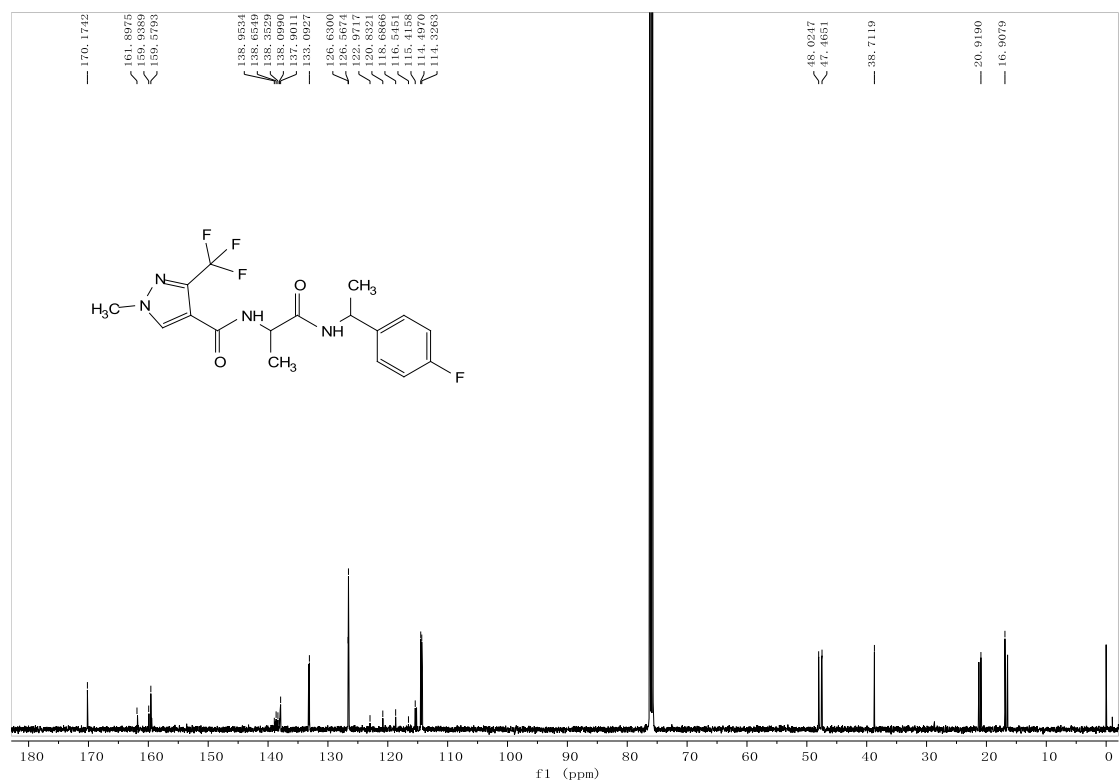

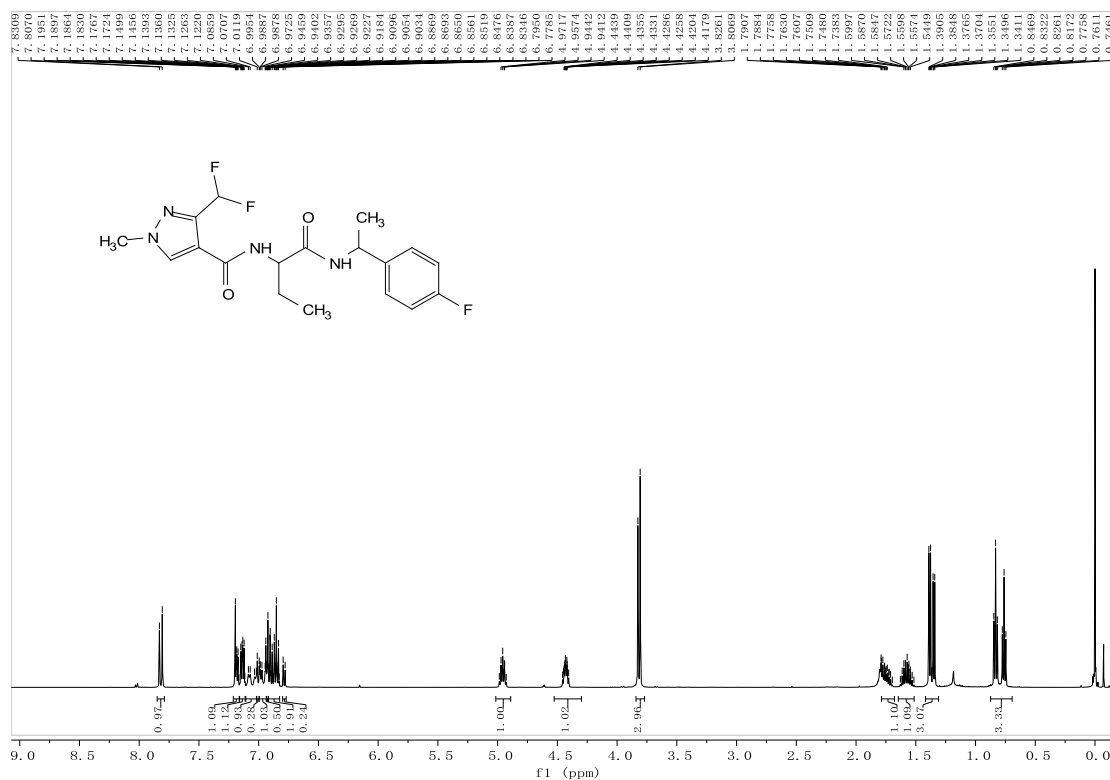

Figure S39. <sup>1</sup>H NMR spectrum of compound II-b-20.

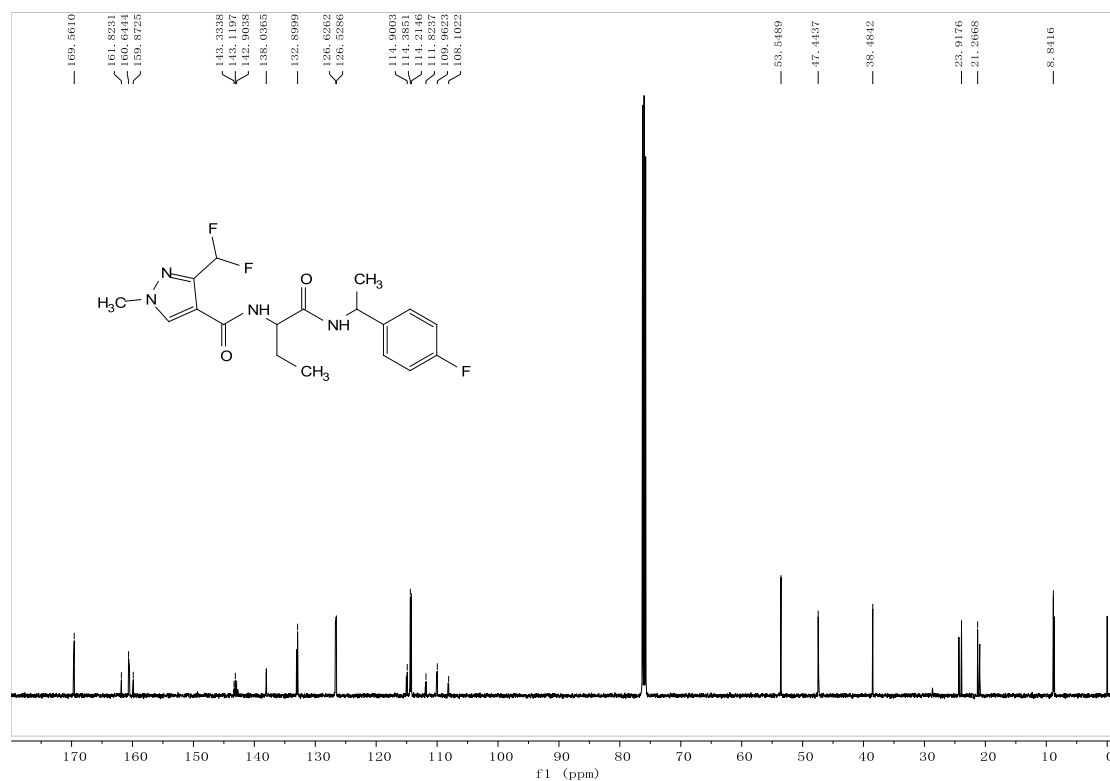

Figure S40. <sup>13</sup>C NMR spectrum of compound II-b-20.

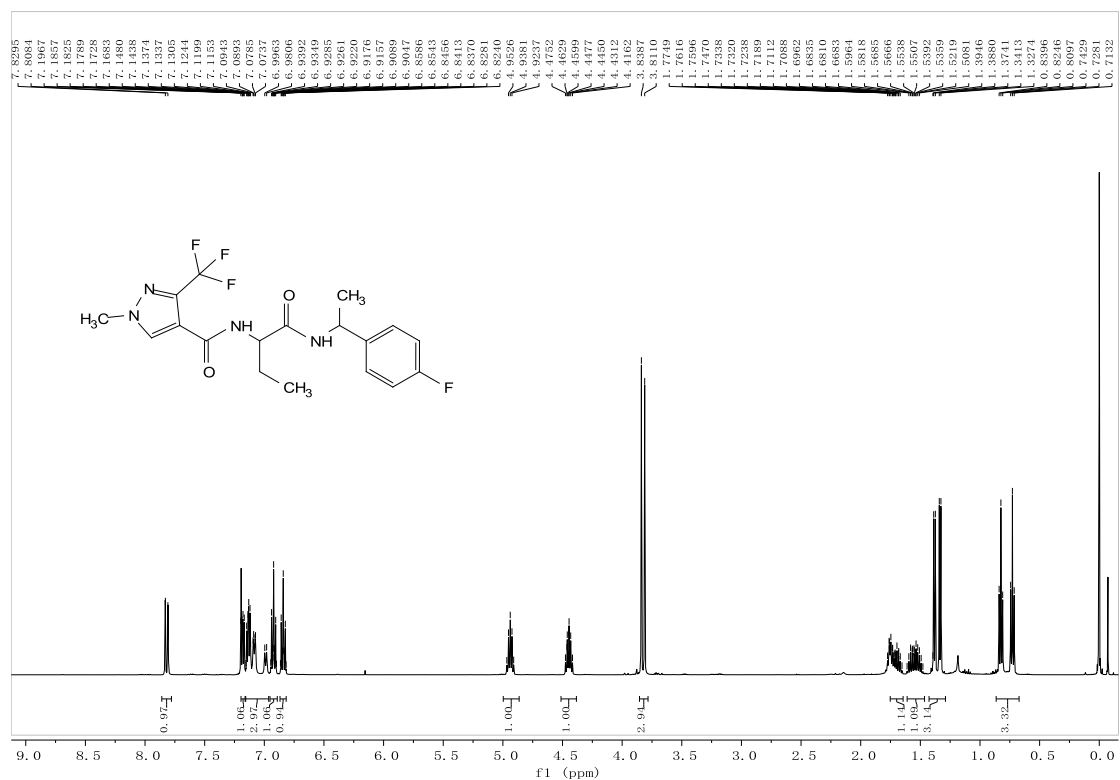

Figure S41. <sup>1</sup>H NMR spectrum of compound II-b-21.

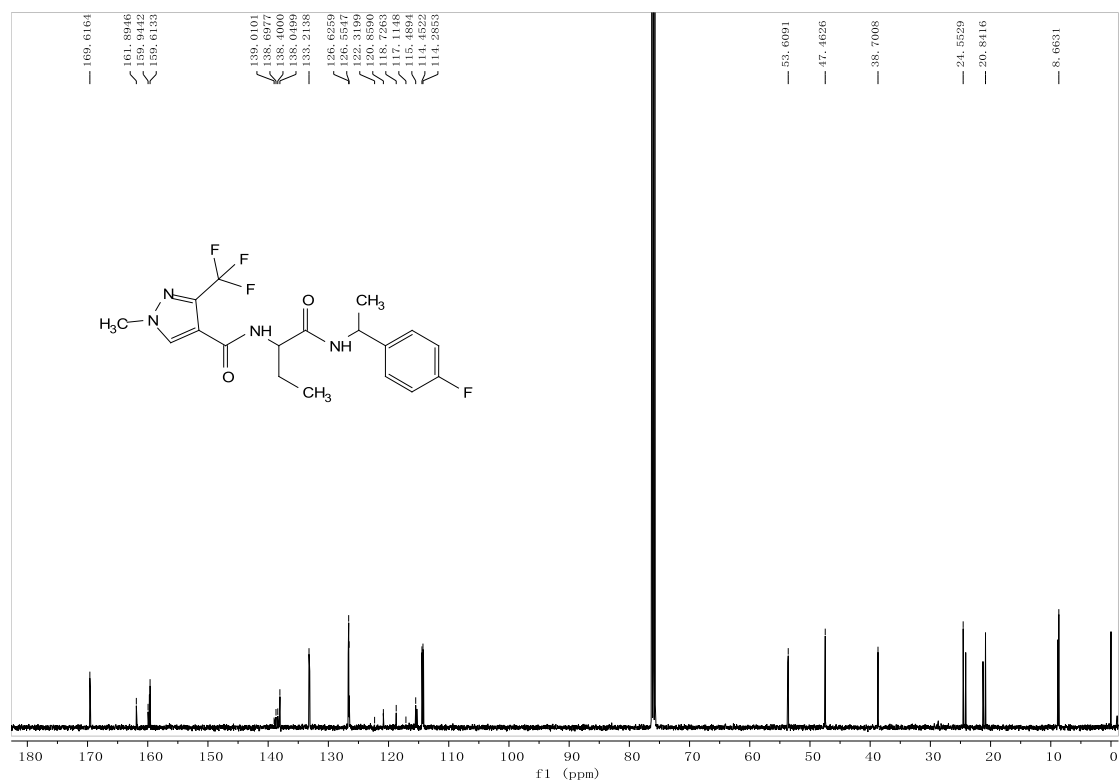

Figure S42. <sup>13</sup>C NMR spectrum of compound II-b-21.

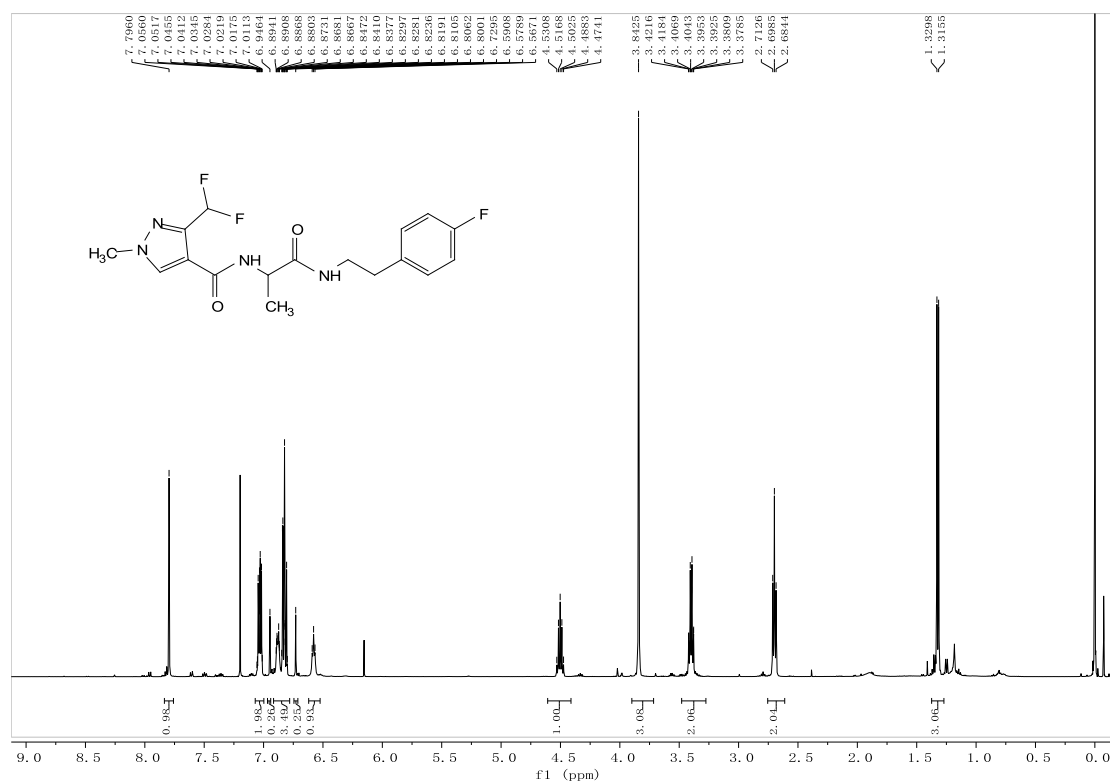

**Figure S43.**  $^1\text{H}$  NMR spectrum of compound II-c-22.

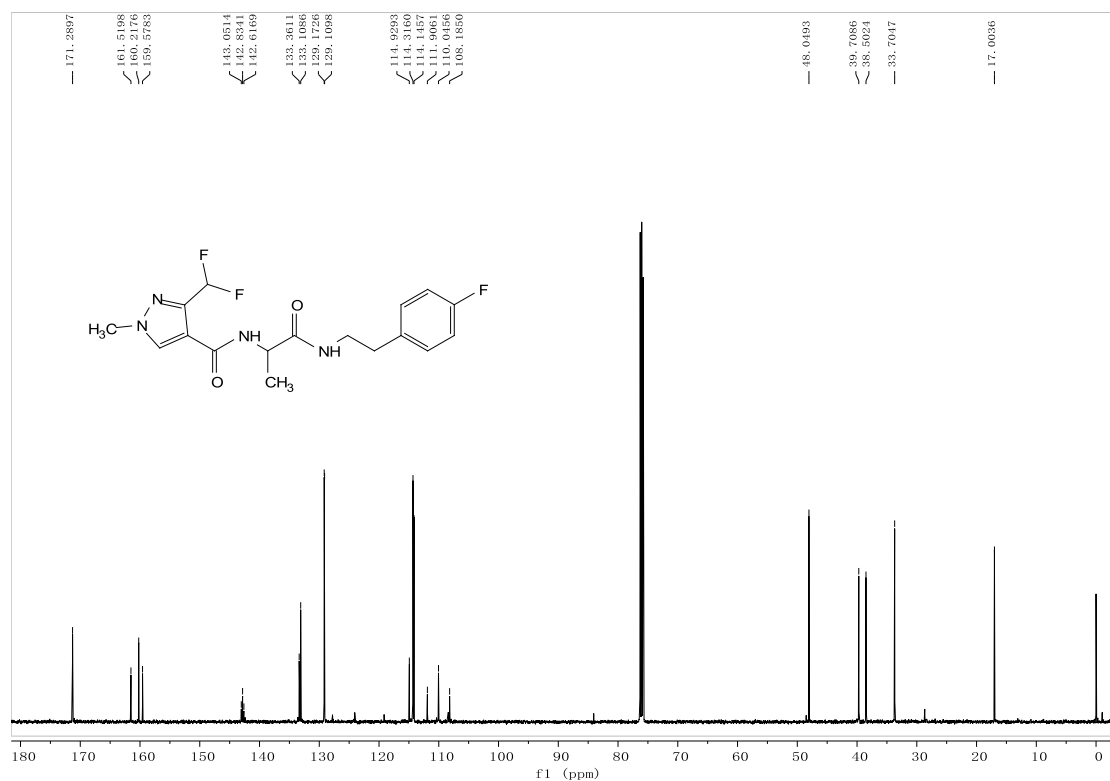

**Figure S44.**  $^{13}\text{C}$  NMR spectrum of compound II-c-22.

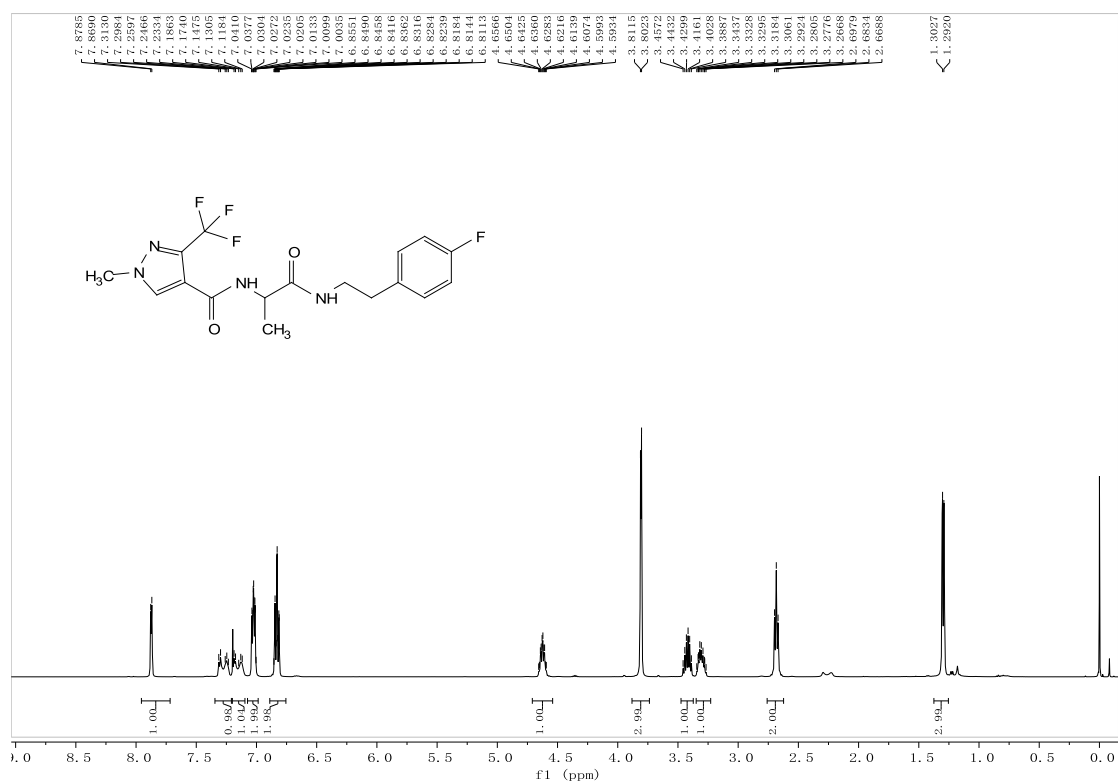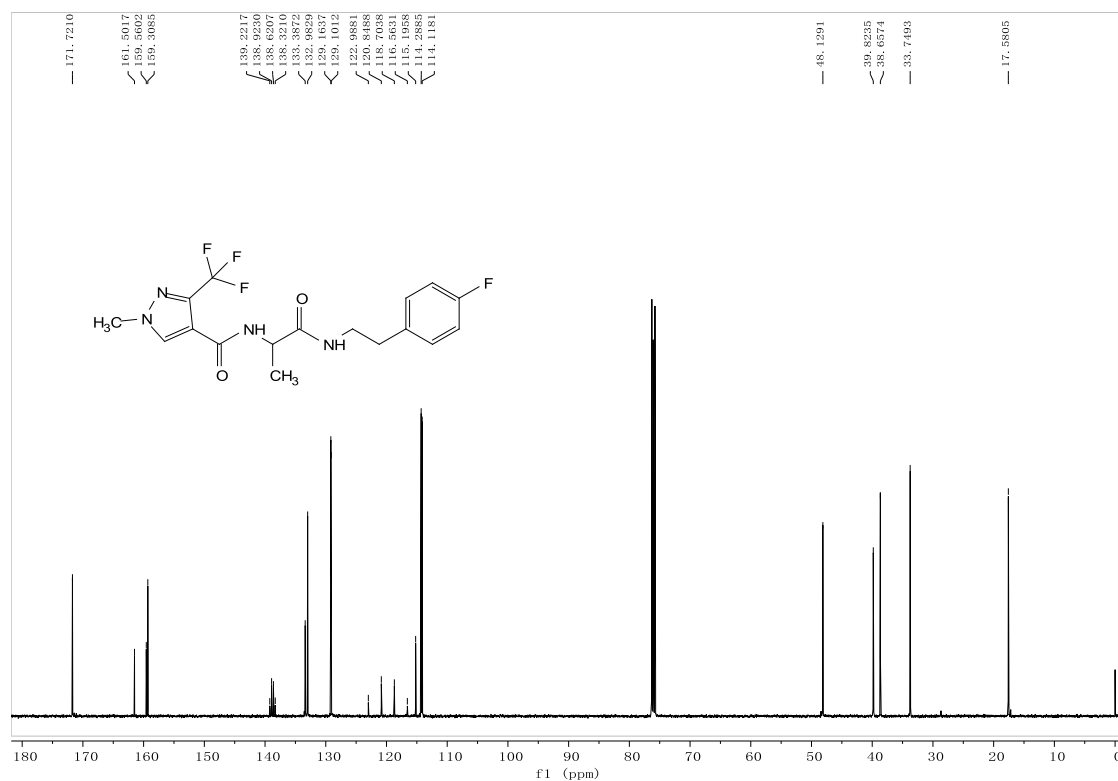



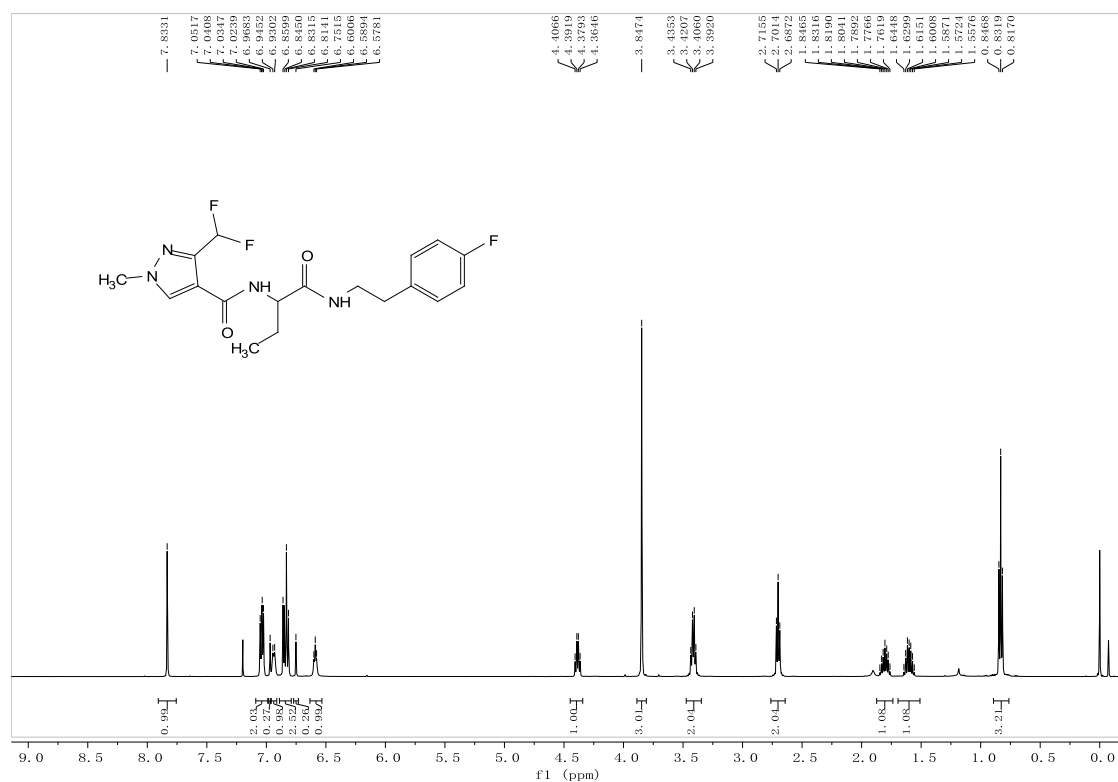

Figure S47. <sup>1</sup>H NMR spectrum of compound II-c-24.

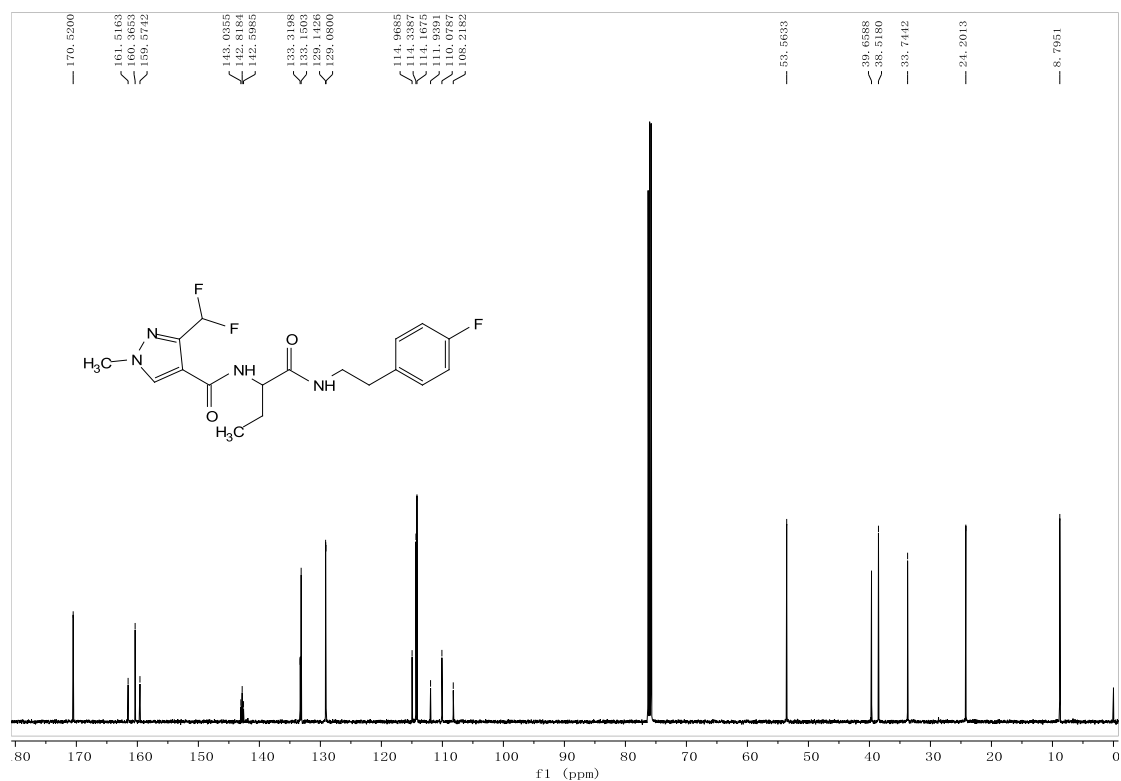

Figure S48. <sup>13</sup>C NMR spectrum of compound II-c-24.

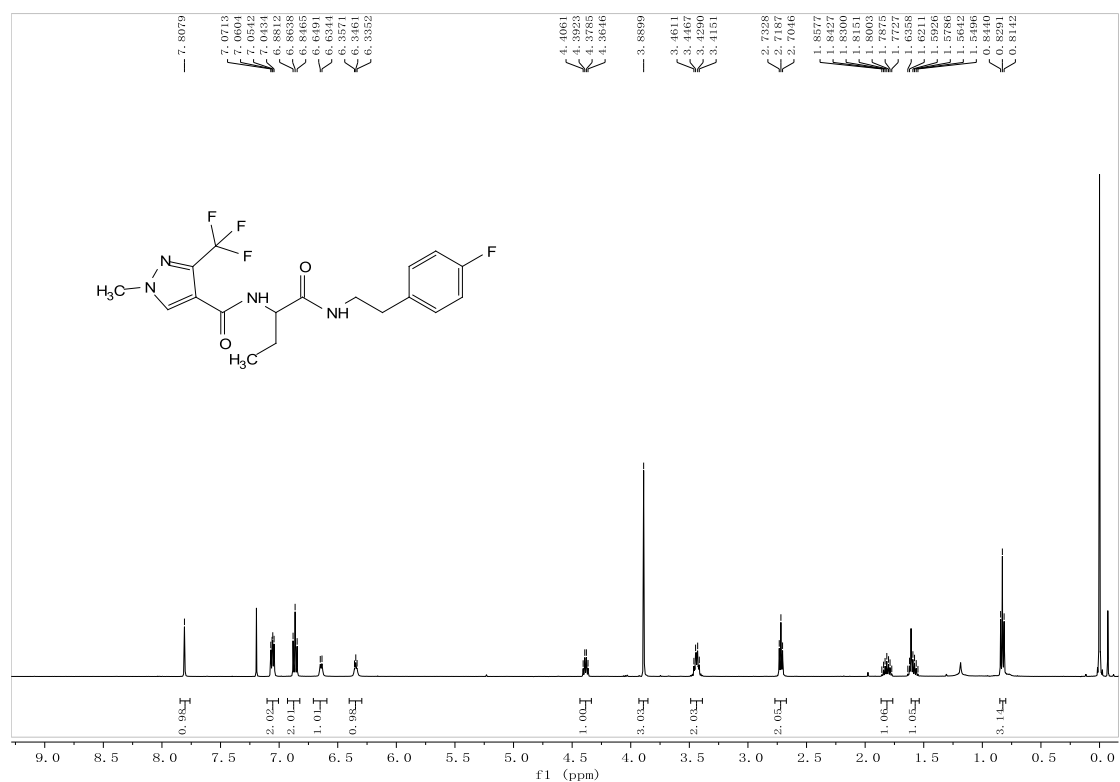

Figure S49. <sup>1</sup>H NMR spectrum of compound II-c-25.

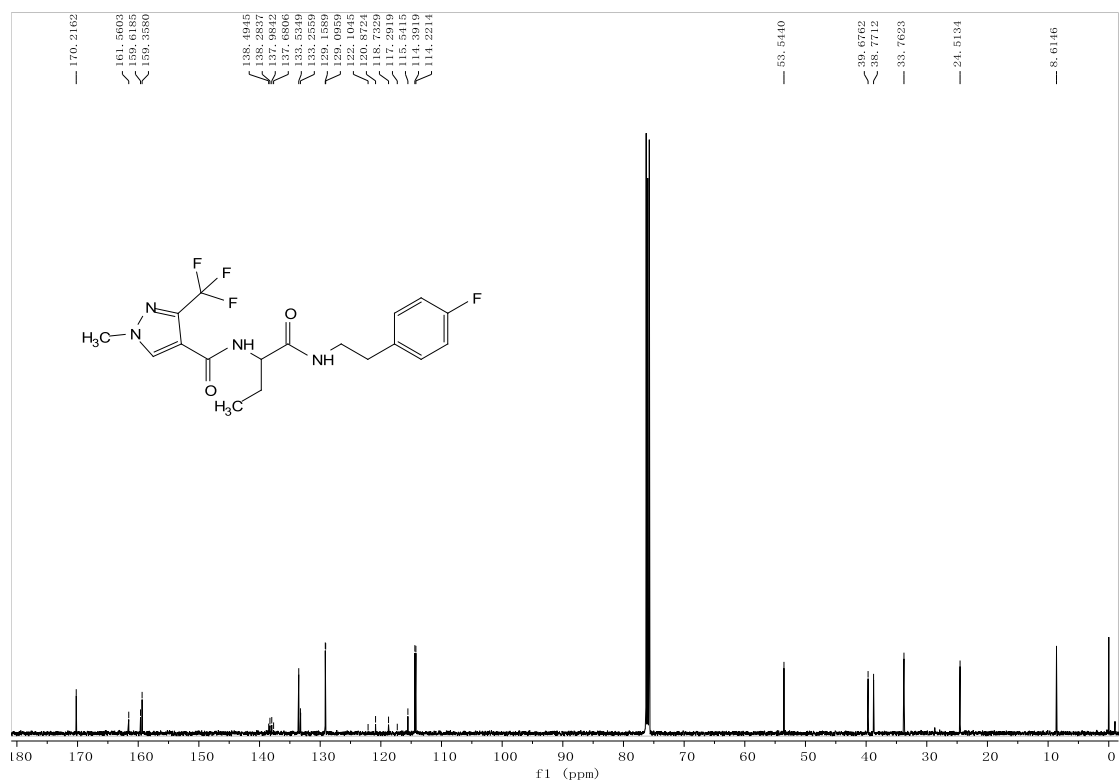

Figure S50. <sup>13</sup>C NMR spectrum of compound II-c-25.

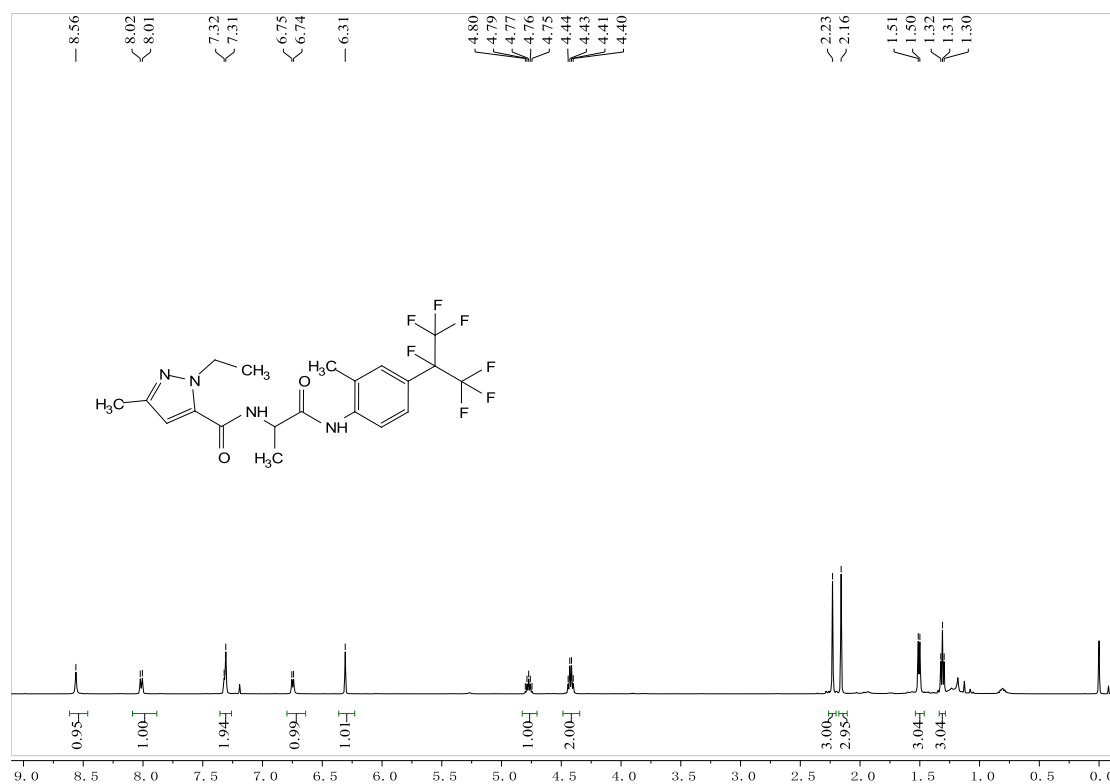

Figure S51. <sup>1</sup>H NMR spectrum of compound III-26.

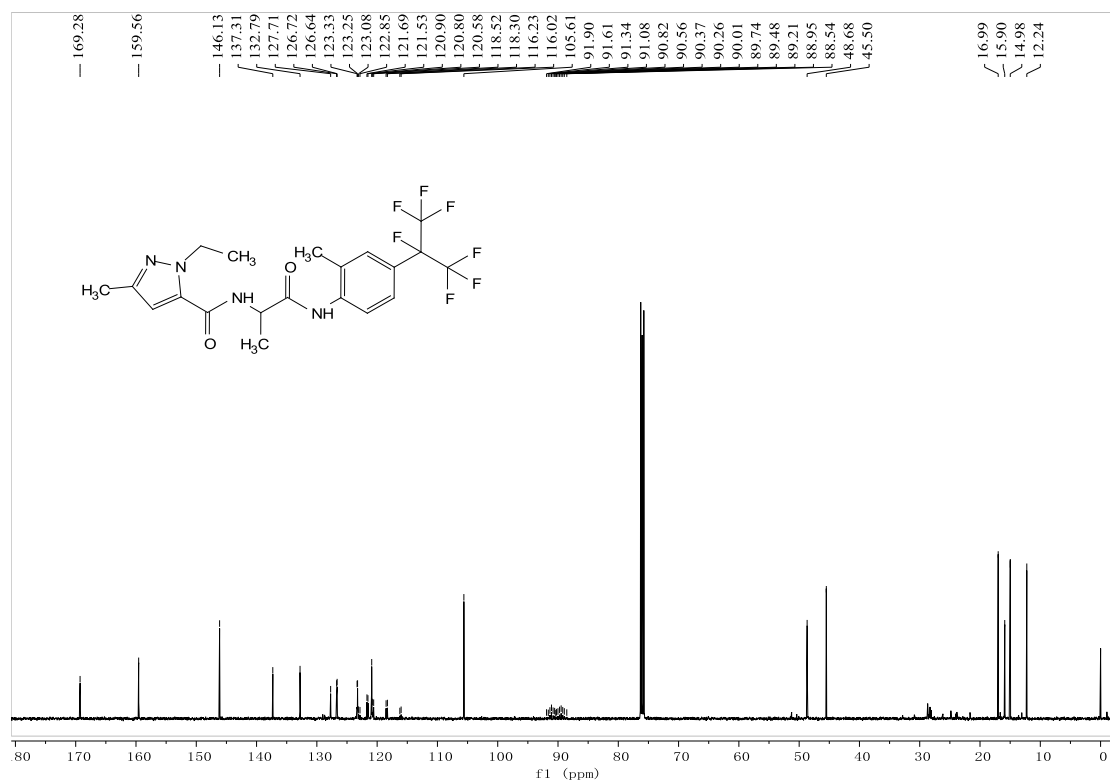

Figure S52. <sup>13</sup>C NMR spectrum of compound III-26.

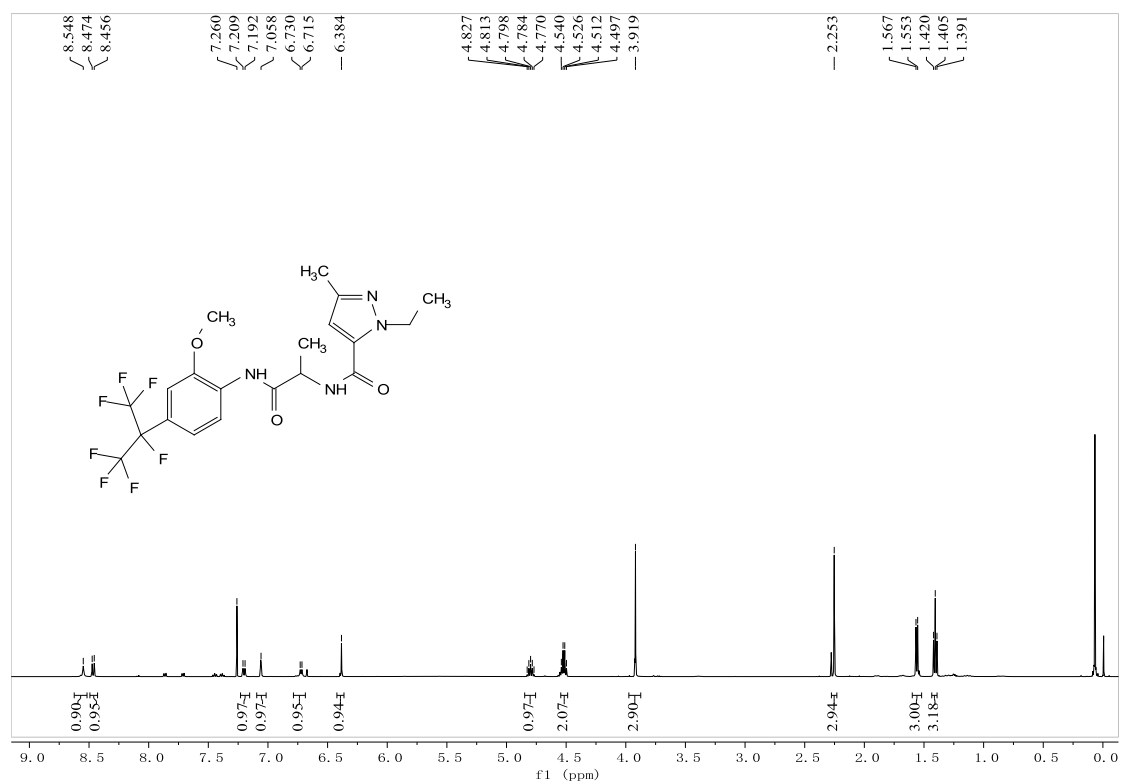

**Figure S53.** <sup>1</sup>H NMR spectrum of compound III-27.

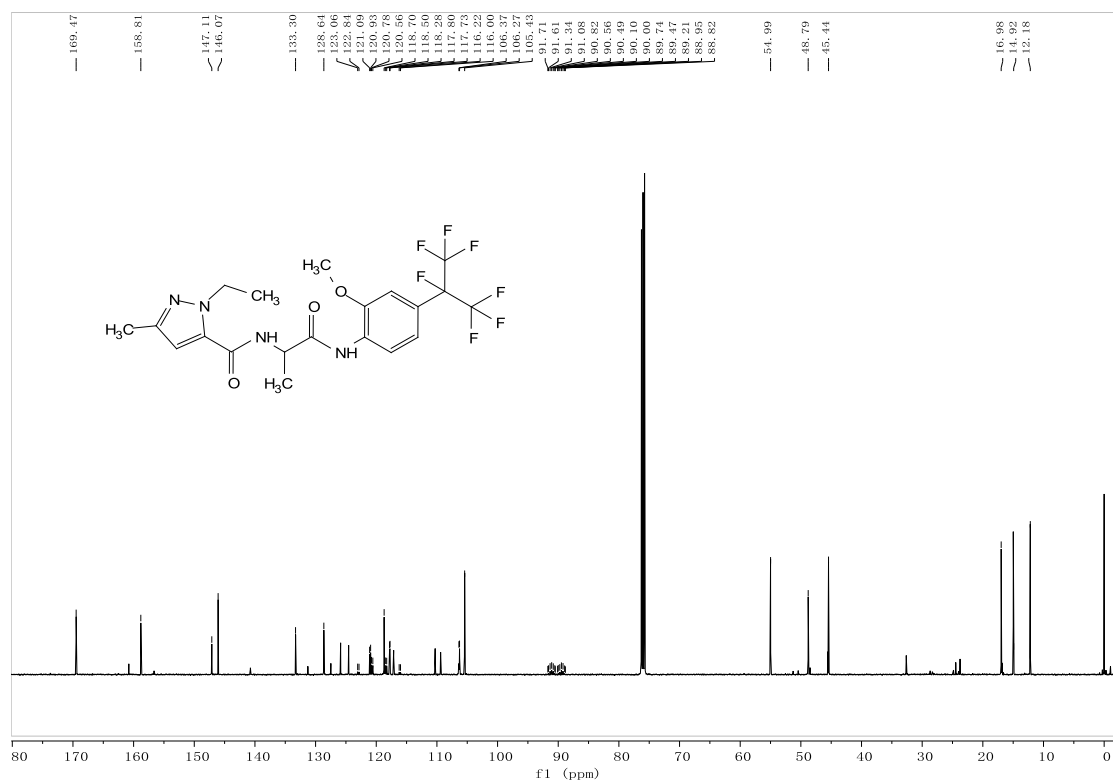

**Figure S54.** <sup>13</sup>C NMR spectrum of compound III-27.

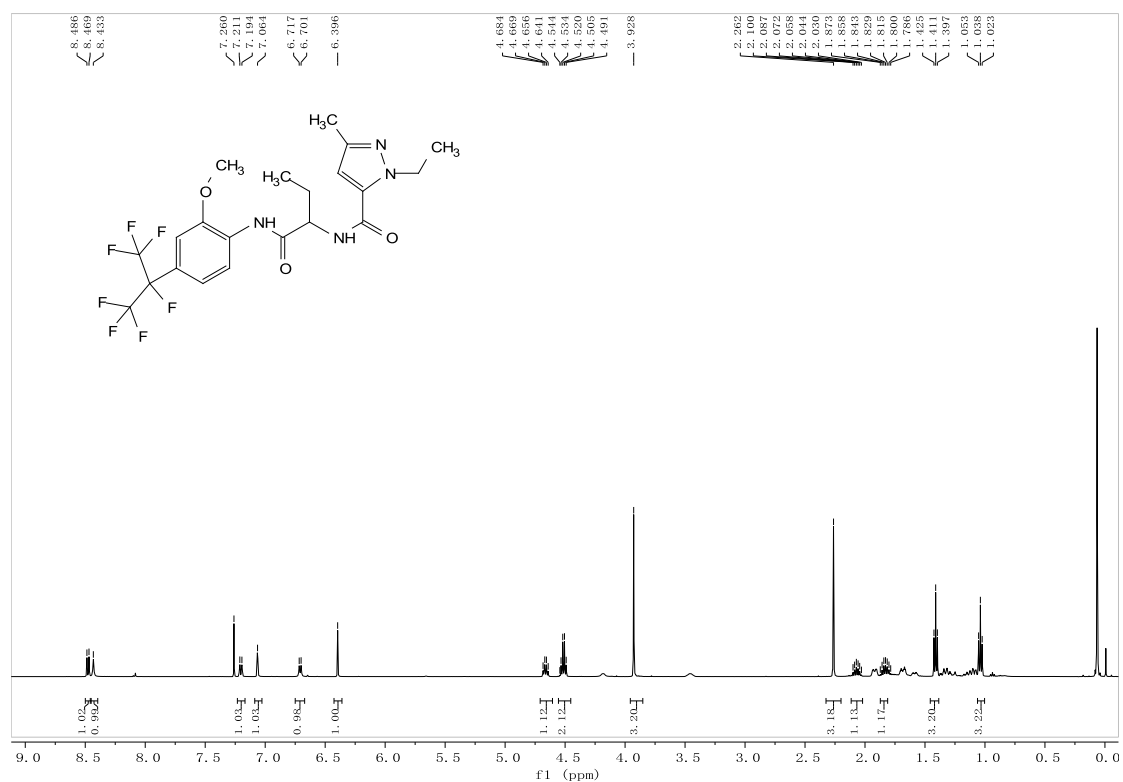

Figure S55. <sup>1</sup>H NMR spectrum of compound III-28.

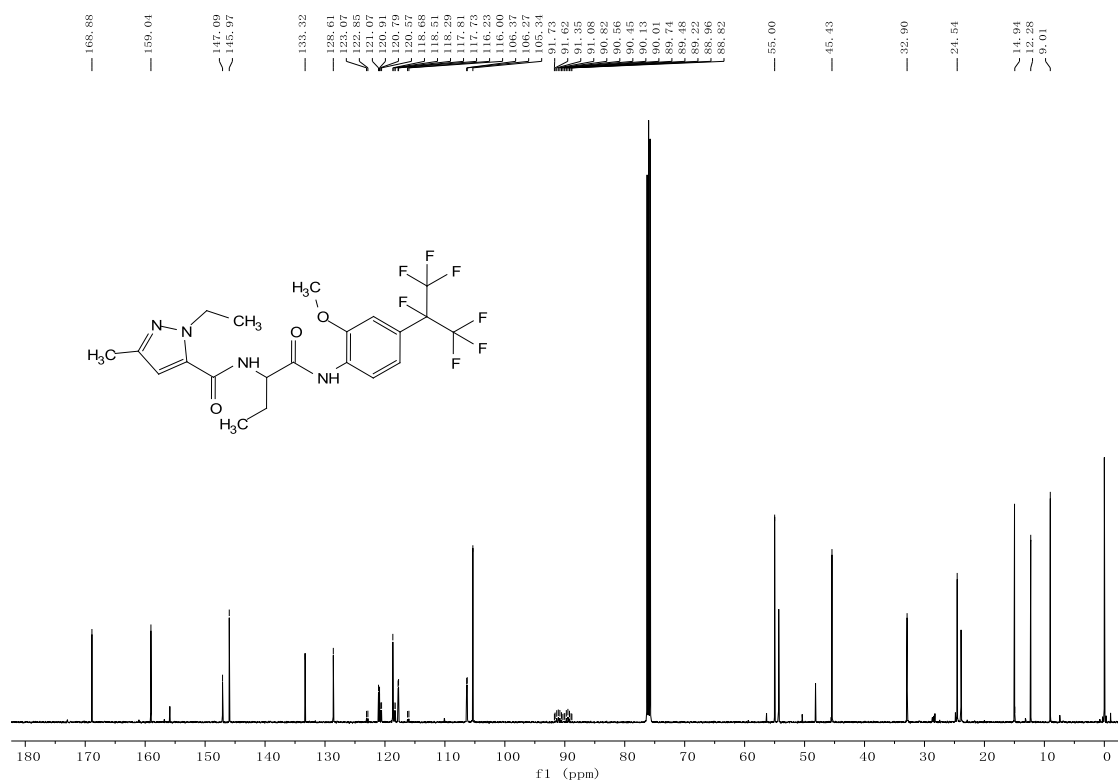

Figure S56. <sup>13</sup>C NMR spectrum of compound III-28.

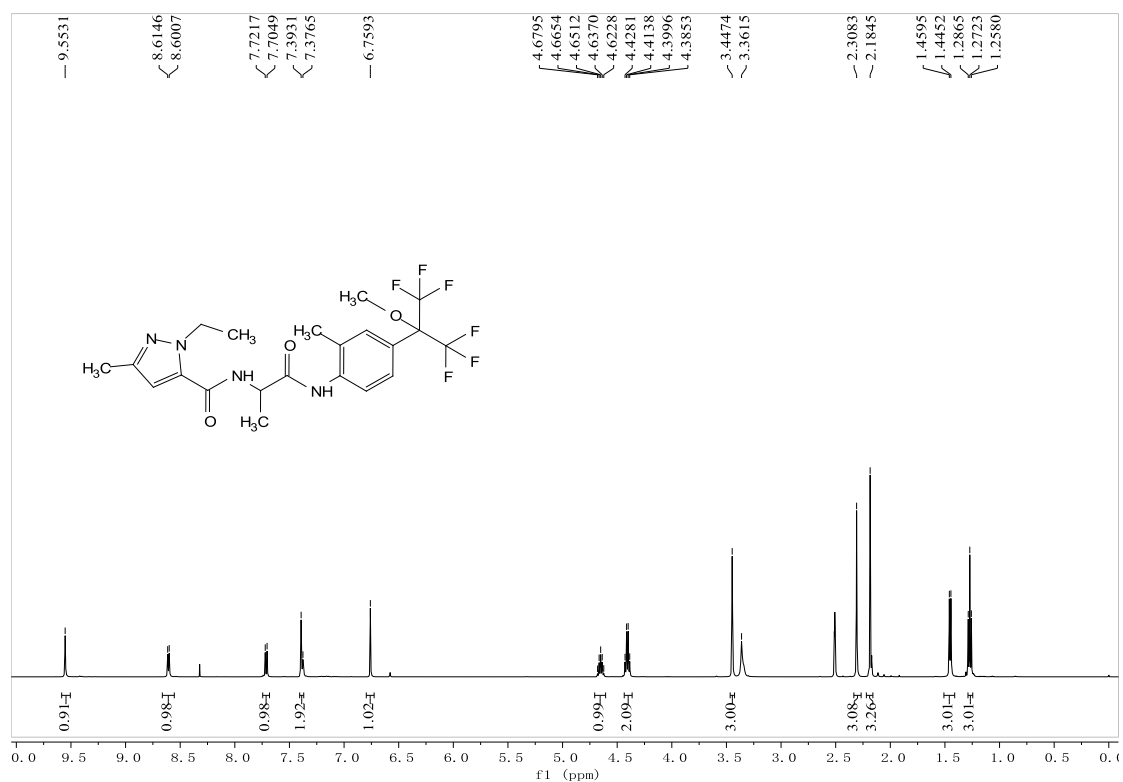

**Figure S57.** <sup>1</sup>H NMR spectrum of compound III-29.

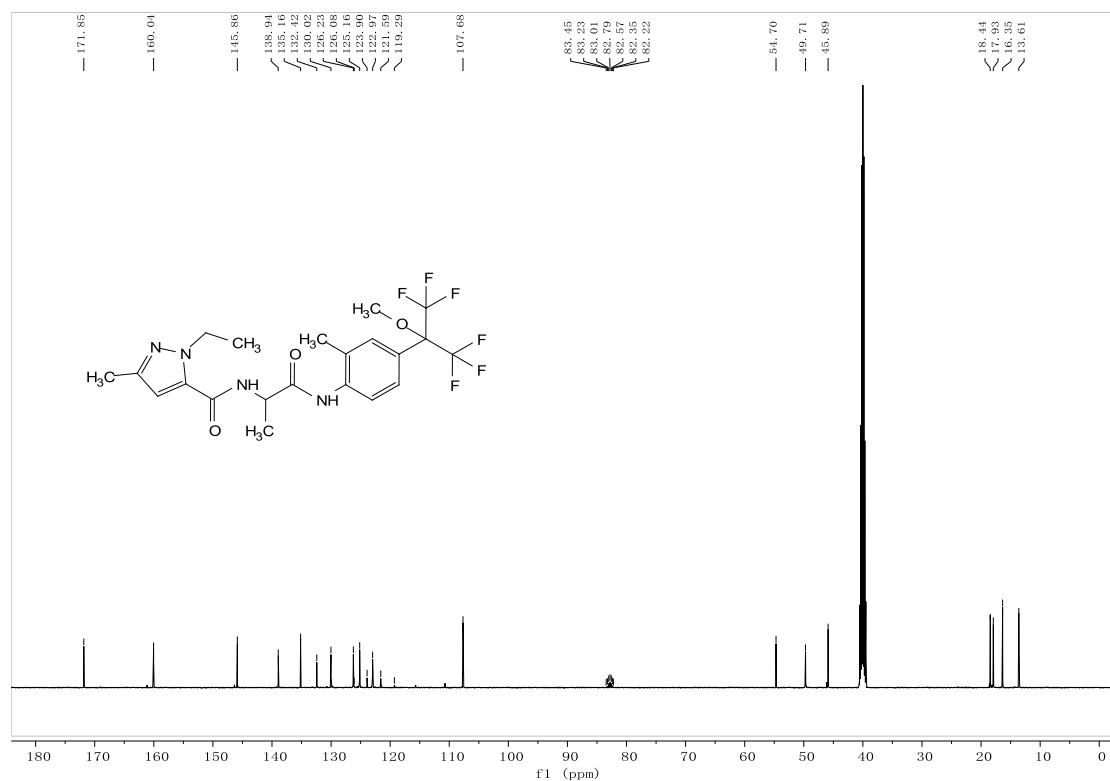

**Figure S58.** <sup>13</sup>C NMR spectrum of compound III-29.

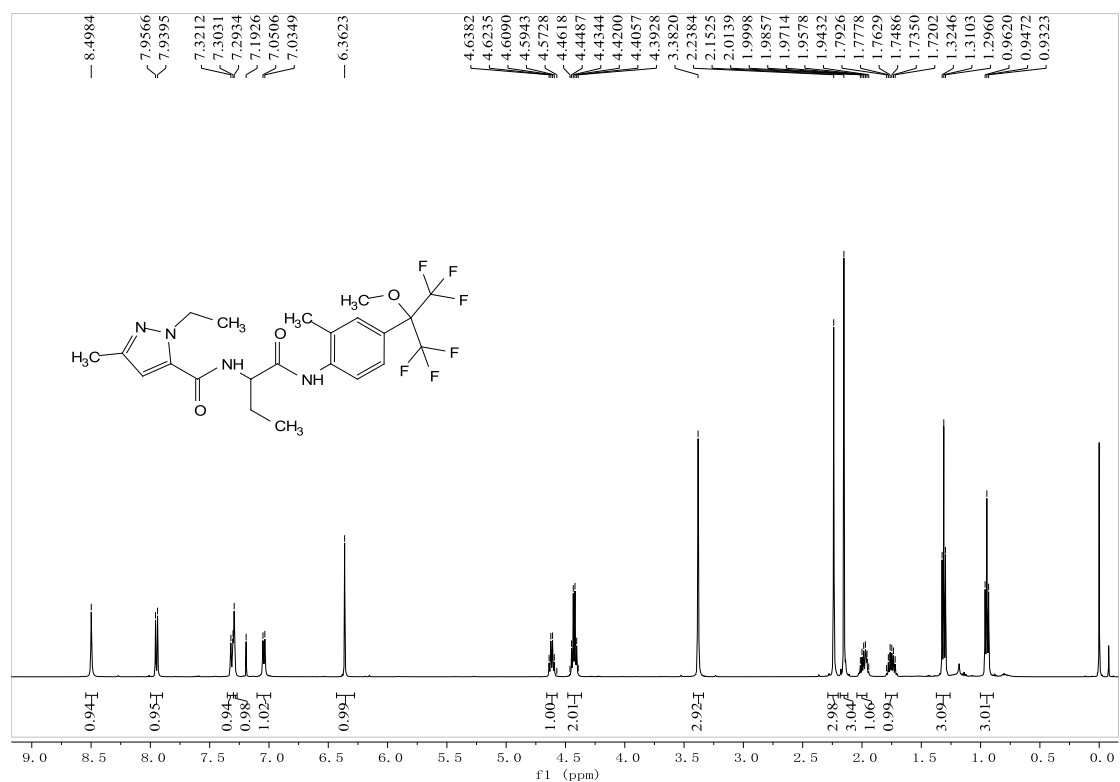

**Figure S59.** <sup>1</sup>H NMR spectrum of compound III-30.

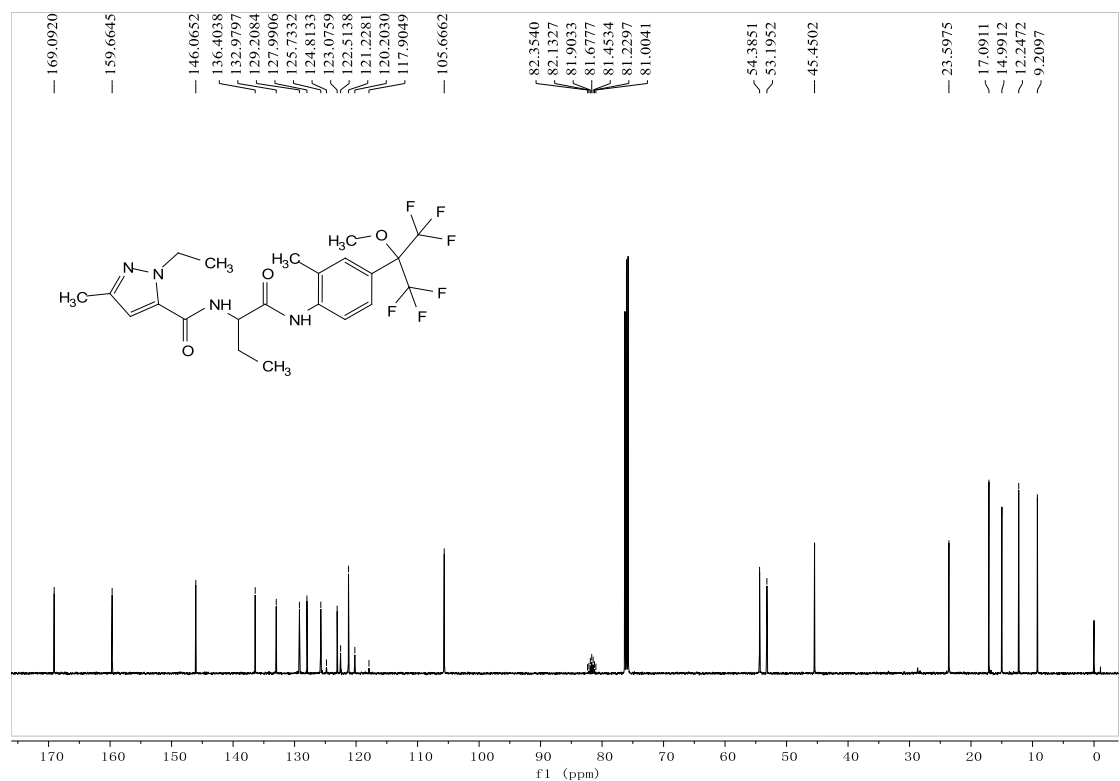

**Figure S60.** <sup>13</sup>C NMR spectrum of compound III-30.
